# 1 **Prokaryotic Argonaute from *Archaeoglobus fulgidus* interacts with** 2 **DNA as a homodimer**

3 Edvardas Golovinas<sup>1</sup>, Danielis Rutkauskas<sup>1,2</sup>, Elena Manakova<sup>1</sup>, Marija Jankunec<sup>1,3</sup>, Arunas  
4 Silanskas<sup>1</sup>, Giedrius Sasnauskas<sup>1</sup>, Mindaugas Zaremba<sup>1,\*</sup>

5 <sup>1</sup> Institute of Biotechnology, Life Sciences Center, Vilnius University, Sauletekio av. 7, LT-10257,  
6 Vilnius, Lithuania.

7 <sup>2</sup> Institute of Physics, Center for Physical Sciences and Technology, Savanoriu 231, LT-02300,  
8 Vilnius, Lithuania

9 <sup>3</sup> Institute of Biochemistry, Life Sciences Center, Vilnius University, Sauletekio av. 7, LT-10257,  
10 Vilnius, Lithuania.

11 \* To whom correspondence should be addressed. Tel: +370-5-2234357; Fax: +370-5-2234367; Email:  
12 zare@ibt.lt.

13

## 14 **ABSTRACT**

15 **Background:** Argonaute (Ago) proteins are found in all three domains of life. The best characterized  
16 group is eukaryotic Argonautes (eAgos), which are the core of RNA interference. The best understood  
17 prokaryotic Ago (pAgo) proteins are full-length pAgos. They are monomeric proteins, all composed of  
18 four major structural/functional domains (N, PAZ, MID and PIWI) and thereby closely resemble eAgos.  
19 It is believed that full-length pAgos function as prokaryotic antiviral systems, with the PIWI domain  
20 performing cleavage of invading nucleic acids. However, the majority of identified pAgos are shorter  
21 and catalytically inactive (encode just MID and inactive PIWI domains), thus their action mechanism  
22 and function remain unknown.

23 **Results:** In this work we focus on AfAgo, a short pAgo protein encoded by an archaeon  
24 *Archaeoglobus fulgidus*. We find that in all previously solved AfAgo structures, its two monomers form  
25 substantial dimerization interfaces involving the C-terminal  $\beta$ -sheets. Led by this finding, we have  
26 employed various biochemical and biophysical assays, including single-molecule FRET, SAXS and  
27 AFM, to test the possible dimerization of AfAgo. SAXS results confirm that WT AfAgo, but not the  
28 dimerization surface mutant AfAgo $\Delta$ , forms a homodimer both in the apo-form and when bound to a  
29 nucleic acid. Single molecule FRET and AFM studies demonstrate that the dimeric WT AfAgo binds  
30 two ends of a linear DNA fragment, forming a relatively stable DNA loop.

31 **Conclusion:** Our results show that contrary to other characterized Ago proteins, AfAgo is a stable  
32 homodimer in solution, which is capable of simultaneous interaction with two DNA molecules. This  
33 finding broadens the range of currently known Argonaute-nucleic acid interaction mechanisms.

34 **KEYWORDS**

35 Protein-DNA interactions, Argonaute, pAgo, AFM, smFRET, SAXS

36 **INTRODUCTION**

37 Argonaute (Ago) proteins are found in all three domains of life (bacteria, archaea, and eukaryotes).

38 The best characterized group is eukaryotic Ago (eAgo) proteins. Being the functional core of RNA

39 interference machinery, eAgos are involved in regulation of gene expression, silencing of mobile

40 genome elements, and defense against viruses. From the structural and mechanistic point of view, all

41 eAgos are very similar, as they all use small RNA molecules as guides for sequence-specific

42 recognition of RNA targets, and are monomeric proteins sharing four conserved functional domains,

43 which are organized in a bilobed structure [1]. The N-terminal lobe consists of the N-domain that

44 separates guide and target strands [2], and the PAZ domain responsible for binding the 3'-terminus of

45 the guide RNA; the C-terminal lobe consists of the MID domain, which binds the 5'-terminus of the

46 guide RNA, and the PIWI domain, an RNase. Upon recognition of the RNA target, eAgos may either

47 cleave it employing the catalytic activity of the PIWI domain, or, especially eAgo proteins that encode

48 catalytically inactive PIWI domains, recruit partner proteins leading to degradation of the target RNA

49 or repression of its translation [3].

50 Ago proteins are also identified in 9% of sequenced bacterial and 32% archaeal genomes [4, 5].

51 Unlike eAgos, which exclusively use RNA guides for recognition of RNA targets, different pAgos may

52 use either RNA or DNA guides and/or targets [6], and may also differ in their structural organization.

53 The best understood prokaryotic Ago (pAgo) proteins are the so called full-length pAgos, which are

54 composed of N, PAZ, MID and PIWI domains, and thus closely resemble eAgo proteins. There is

55 mounting evidence that full-length pAgos function as prokaryotic antiviral systems, with the PIWI

56 domain performing cleavage of invading nucleic acids. However, the majority (~60 %) of identified

57 pAgos are shorter (encode just MID and PIWI domains) and are catalytically inactive due to mutations

58 in the PIWI domain. Though similar artificial truncations of eukaryotic Agos preserve most of

59 functionality characteristic to full-length proteins [7–10], the function and mechanism of the naturally-

60 occurring short catalytically inactive pAgos remains unknown [4, 5].

61 In this work we focus on the short prokaryotic Argonaute AfAgo encoded by a hyperthermophilic

62 archaeon *Archaeoglobus fulgidus* [4, 5]. Like other short pAgos, AfAgo contains a MID and a

63 catalytically inactive PIWI domains (albeit sequence analysis suggests that AfAgo MID and PIWI  
64 domains are closer to those found in full-length, rather than most short pAgos [4, 5]). For over a  
65 decade it served as a model system for structural and mechanistic studies of Argonaute-nucleic acids  
66 interactions [10–12]. It is also one of the first and the best structurally characterized prokaryotic  
67 Argonautes, with an apo- and 3 dsDNA/RNA-bound structures currently available [13–16]. However,  
68 its biological role, in part due to lack of catalytic activity, remains elusive. Unexpectedly, inspection of  
69 these structures revealed that regardless of the crystal form and symmetry, two AfAgo subunits  
70 always form a substantial dimerization interface involving N-terminal residues and/or  $\beta$ -strands  
71 located close to the C-termini. Using various biochemical and biophysical assays, including single-  
72 molecule FRET, small angle X-ray scattering (SAXS), and atomic force microscopy (AFM), we show  
73 that AfAgo is indeed a stable homodimer in solution, and is capable of simultaneous interaction with  
74 two DNA molecules. This broadens the range of currently known interaction mechanisms involving  
75 nucleic acids and Argonaute proteins.

## 76 RESULTS

### 77 AfAgo is a homodimer in the available X-ray structures

78 AfAgo is a 427 amino acid (aa) 49.2 kDa prokaryotic Argonaute protein found in the hyperthermophilic  
79 archaeon *Archaeoglobus fulgidus*. To date, four AfAgo structures, both of the apo-form and bound to  
80 DNA and RNA duplexes were solved [13–16]. AfAgo monomer is composed of two major domains,  
81 the N-terminal MID (residues 38-168), and the C-terminal PIWI (residues 168-427) [13]. The MID  
82 domain specifically binds the 5'-phosphorylated end of the presumed guide DNA/RNA strand, and  
83 also makes contacts to the complementary target DNA/RNA strand [14–16]. The PIWI domain makes  
84 contacts to both guide and target DNA/RNA strands, but is catalytically inactive due to mutations in  
85 the RNase H-like catalytic center. Unexpectedly, inspection of available AfAgo structures  
86 (Supplementary table S4) revealed that in all structures known so far, AfAgo subunits form  
87 homodimers. The dimerization interface in the AfAgo-dsRNA structure (PDB ID 1ytu) is asymmetric,  
88 and primarily involves the C-terminal  $\beta$ -strands (residues 296-303) from both subunits present in the  
89 asymmetric unit that together form a parallel  $\beta$ -sheet, and the N-terminal residues from one of the  
90 subunits (Figure 1A). The dimer formed in this case is compact (henceforth, a 'closed' dimer). In  
91 contrast, dimerization interfaces in three other cases (PDB IDs 1w9h, 2bgg and 2w42) are nearly  
92 symmetrical with respect to the secondary structure elements involved (albeit in PDB IDs 2bgg and

93 2w42 they belong to different protein chains present in the asymmetric unit): the C-terminal  $\beta$ -strands  
94 form 8-strand  $\beta$ -barrels, with the sheets from different subunits interacting via strands  $\beta$ 14 (residues  
95 297-302) and  $\beta$ 15 (residues 314-318, Figure 1B). The resultant dimers are less compact (henceforth,  
96 'open' dimers).

97 The solvent accessible surface areas buried at the dimerization interfaces, as calculated by the PISA  
98 server (<https://www.ebi.ac.uk/pdbe/pisa/pistart.html>, [17]) and the number of inter-subunit H-bonds  
99 (Supplementary table S4) in both 'open' and 'closed' dimers are typical for stable protein dimerization  
100 interfaces [18, 19]. This observation prompted us to test the oligomeric state, the possible  
101 dimerization mode, and mechanism of nucleic acid binding of AfAgo in solution using various  
102 biochemical and biophysical techniques. For that purpose, we used two variants of AfAgo: the full-  
103 length wild-type protein (henceforth, WT AfAgo), and a dimerization mutant AfAgo lacking the 296-303  
104 amino acid residues involved in dimerization (henceforth, AfAgo $\Delta$ ). Both proteins were successfully  
105 purified as described in Materials and Methods, albeit the AfAgo $\Delta$  variant was prone to aggregation.  
106 Stability of both proteins was considerably improved upon addition of a phosphorylated blunt-end  
107 DNA oligoduplex MZ-1289 (Supplementary table S1).

## 108 **SAXS measurements**

109 To determine the solution conformation and oligomeric state of AfAgo, we have performed small angle  
110 X-ray scattering (SAXS) measurements using DNA-bound and DNA-free full-length WT AfAgo protein  
111 and the DNA-bound dimerization mutant AfAgo $\Delta$ . Two types of data analysis were performed: (i) the  
112 *ab initio* shapes of the proteins in solution were calculated and superimposed with the X-ray AfAgo  
113 structures, and (ii) the theoretical scattering data was calculated for the crystallized AfAgo monomer,  
114 'open' (PDB ID: 2w42 and 1w9h) and 'closed' (PDB ID: 1ytu (with and without bound dsRNA)) dimers,  
115 and compared to experimental SAXS scattering data of AfAgo and AfAgo $\Delta$  (Figure 1**Error! Reference**  
116 **source not found.**). The 'closed' AfAgo dimer fits the DNA-bound and DNA-free WT AfAgo SAXS  
117 data better than the 'open' dimer, as judged from the real space fit and the  $\chi^2$  (Figure 1C) parameters  
118 that reflect the agreement between scattering functions of corresponding crystal structures and SAXS  
119 experiments (Figure 1C). As expected, AfAgo monomer gave the best fit to the AfAgo $\Delta$  SAXS data  
120 (Figure 1C, right column). The SAXS molecular weights calculated for AfAgo (between 94.2 and  
121 106.9 kDa (108-133 kDa for apo AfAgo, that was prone to aggregation), Supplementary table S3)  
122 agreed with the expected mass of the dimer complexed with dsDNA (110.5 kDa). The SAXS MW for

123 the AfAgo $\Delta$  (between 55.4 and 67.9 kDa) confirmed the monomeric state of the dimerization mutant-  
124 dsDNA complex.

### 125 **Direct visualization of AfAgo-induced DNA loops by AFM**

126 AfAgo and DNA were deposited on APS-mica and imaged using tapping AFM. A typical AFM image of  
127 AfAgo-DNA complexes is shown in Figure 2. Several types of protein-DNA complexes, shown as  
128 enlarged insets in Figure 2, were observed: (i) linear DNA with a protein molecule bound to one DNA  
129 end; (ii) linear DNA with protein molecules bound to both DNA ends; (iii) ring-shaped (looped) DNA.  
130 Other species, including naked DNA, or more complex structures, involving, e.g., protein bound to two  
131 DNA fragments, were also observed, but were not quantified. We find that the relative distribution of  
132 different complexes varied dramatically for WT AfAgo and the dimerization mutant AfAgo $\Delta$  (Table 1).  
133 The ring-shaped DNA-protein complexes are the dominant species observed with WT AfAgo (55% or  
134 114 out of 208 complexes). The minor fraction of DNA molecules had either protein bound to one end  
135 (29%, 61 out of 208 complexes) or to both ends (16%, 33 out of 208). In the case of AfAgo $\Delta$ , the  
136 majority of complexes had protein bound to both DNA ends (59%, or 187 out of 319, Table 1), and a  
137 much lesser fraction (12%, or 38 out of 319) were ring-shaped structures. Since AfAgo $\Delta$  lacks the  
138 dimerization interface observed in the structures, the observed small fraction of ring-shaped DNA  
139 complexes could be due to sample treatment with glutaraldehyde (see Materials and Methods for  
140 details), which could occasionally lead to inadvertent cross-linking of two AfAgo $\Delta$  monomers bound to  
141 termini of the same DNA molecule, thereby generating looped complexes.

### 142 **WT AfAgo induces DNA loops in solution**

143 Dimerization of WT AfAgo observed in X-ray structures and SAXS measurements is unique among  
144 Argonaute proteins. It raises a question if the AfAgo/DNA stoichiometry observed in the structures, an  
145 AfAgo dimer bound to two nucleic acid molecules, is also relevant in solution. To address this question  
146 we have examined the interaction of AfAgo with a DNA substrate bearing two binding sites exploiting  
147 the method of single-molecule Förster resonance energy transfer (smFRET). If AfAgo binds DNA as a  
148 dimer, as observed in the X-ray structures, it should be capable of interacting with both DNA ends  
149 simultaneously, inducing a DNA loop, which, in addition to AFM, could be monitored as a change of  
150 FRET efficiency between dyes tethered close to DNA ends (Figure 3A). Utilization of a single dual-  
151 labeled two-target DNA substrate (rather than two short DNA duplexes carrying different fluorescent

152 labels) increases the probability of AfAgo interaction with both DNA targets at low reactant  
153 concentrations required for the single-molecule setup.

154 We have designed a 569 bp DNA construct, which was labelled with a pair of FRET fluorophores,  
155 Cy3B and Atto647N, each attached to thymine bases 3 nt away from the respective DNA termini via a  
156 C6 linker (Supplementary figure S2). The positions of FRET labels were selected such that upon  
157 binding of both DNA ends by an AfAgo dimer, the distance between the label attachment sites  
158 (irrespective of the AfAgo dimerization mode), is favorable for FRET (Supplementary figure S4). To  
159 promote tighter binding, both DNA ends were phosphorylated, and the 5'-terminal nucleotides were  
160 adenines, since AfAgo, like Argonaute CbAgo from *Clostridium butyricum* [20], has a preference for a  
161 5'-terminal A (publication in preparation).

162 AfAgo interaction with the DNA fragment was monitored by analyzing the fluorescence bursts of  
163 single diffusing DNA fragments (Figure 3B). For each DNA molecule we have calculated two  
164 parameters. The first parameter S represents the stoichiometry of different fluorophores present on  
165 the DNA, and is equal to the ratio  $I_d/(I_d + I_a^a)$ , where  $I_d$  is the total donor and acceptor intensity upon  
166 donor excitation, and  $I_a^a$  is acceptor intensity upon acceptor excitation. The relative excitation  
167 intensities of the donor and acceptor fluorophores were adjusted such that the stoichiometry  
168 parameter S was about 0.5 for DNA molecules labeled with both fluorophores, approx. 0 for the  
169 acceptor-only DNA, and close to 1.0 for the donor-only DNA. The second parameter, the proximity  
170 ratio E, is equal to  $I_d^a/(I_d^a + I_d^d)$ , where  $I_d^a$  and  $I_d^d$  are acceptor and donor intensities upon donor  
171 excitation, respectively. It is expected to be higher for looped DNA molecules with the ends brought  
172 into close proximity than for unlooped DNA molecules.

173 The E-S histogram of DNA alone (Figure 3C, left) exhibits a prominent population with low E and  
174 intermediate S values, which corresponds to dual-labeled unlooped (zero-FRET) DNA molecules. The  
175 two minor populations observed in the histogram correspond to donor-only (low E/high S) and  
176 acceptor-only (high E/low S) DNA fragments. The E-S histogram of DNA in the presence of WT AfAgo  
177 exhibits an additional population (intermediate S and intermediate E, Figure 3C, right), which  
178 presumably represents DNA molecules looped by WT AfAgo. For further analysis we chose the dual-  
179 labeled DNA molecules (S between 0.2 and 0.9) and built their E histogram. The histogram exhibits  
180 peaks of near-zero and high E, corresponding to unlooped and looped DNA molecules, respectively  
181 (Figure 3C, right). The fit of this histogram with a sum of two Gaussian functions allowed us to

182 calculate the ratio  $K$  defined as the ratio of the fraction of looped DNA molecules (the area under the  
183 Gaussian with the high  $E$  center) and unlooped DNA molecules (the area under the Gaussian with a  
184 near-zero  $E$  center) over the population of the dual-labeled DNA fragments.

185 We have measured the ratio  $K$  at different WT AfAgo concentrations (Figure 3D). It increased  
186 monotonously with increasing WT AfAgo concentration until it reached the maximum value of 2.5  
187 (corresponds to about 70% of looped DNA molecules) at 1 nM WT, but decreased as the protein  
188 concentration was increased further.

189 A similar set of single molecule experiments was performed with the dimerization mutant AfAgo $\Delta$ . As  
190 shown in Figure 3D, the ratio  $K$  at all AfAgo $\Delta$  concentrations tested was close to zero, indicating that  
191 AfAgo $\Delta$  was unable to induce DNA loops. Lack of DNA looping was not due to lack of DNA binding, as  
192 shown by electrophoretic mobility shift assay (Supplementary figure S5). Moreover, AfAgo $\Delta$  competes  
193 with WT AfAgo for DNA ends, as the  $K$  value observed in a competition experiment performed with  
194 equal concentrations of WT AfAgo dimer and AfAgo $\Delta$  monomer was considerably lower than in an  
195 experiment with WT AfAgo alone (Figure 3D). Taken together, our results indicate that WT AfAgo  
196 dimer is capable of simultaneous interaction with two DNA ends in solution.

### 197 **Dynamics of WT AfAgo-induced DNA loops**

198 To explore the dynamics of the WT AfAgo-induced DNA looping events, we have used total internal  
199 reflection fluorescence (TIRF) microscopy to perform single molecule FRET experiments on surface-  
200 immobilized DNA (Figure 4). For that purpose we used a DNA fragment that was essentially identical  
201 to the one used for single-molecule studies in solution, except that it carried a biotin 386 bp away from  
202 the donor end for surface immobilization (Supplementary figure S2). After verifying that WT AfAgo  
203 induces loops on this substrate in solution (Supplementary figure S6B), we immobilized the  
204 biotinylated DNA on a surface and then recorded fluorescence movies in the absence or in the  
205 presence of WT AfAgo (Supplementary figure S6A). From each frame of the movie we then extracted  
206 donor and acceptor intensities for individual DNA fragments, selected trajectories with anti-correlated  
207 changes of the donor and acceptor intensities (indicating the occurrence of FRET) and calculated the  
208 time courses of the proximity ratio,  $E$ . An example of such a trajectory is presented in Figure 4C. In a  
209 control with no AfAgo we could find no DNA fragments exhibiting FRET (Figure 4B).



210 To assess the average values of different E levels apparent in individual trajectories we pooled the  
211 selected E trajectories and averaged the resulting image within the first 10 s (Figure 4D, left). The  
212 single-molecule population and time-averaged E exhibits two peaks with maxima at 0.09 and 0.36,  
213 corresponding to the unlooped and looped DNA molecules, respectively (Figure 4D, right). These E  
214 values are also in good agreement with the E values obtained from the measurement in solution  
215 (Figure 3C).

216 A superficial inspection of E trajectories of individual DNA fragments revealed that their looping  
217 dynamics are rather diverse. There exist trajectories with the looped state lasting the whole  
218 measurement, whereas other trajectories are more dynamic (Figure 4C, Supplementary figure S6C,  
219 D), exhibiting a number of transitions between the looped and unlooped states. The looped E state  
220 also exhibits more subtle dynamics (Supplementary figure S6D) which could probably be attributed to  
221 the conformational flexibility of AfAgo at the dimerization interface.

222 To quantify the looped state duration we first idealized the E trajectories using HMM in QuB software  
223 (Figure 4E). Then, from the idealized trajectories we built the cumulative histogram of the looped state  
224 durations (Figure 4F). The trajectory edge dwells were not omitted in order to preserve the information  
225 on the occurrence of states lasting during the whole trajectory. The exponential factor of a single-  
226 exponential fit of the cumulative histogram was  $33 \pm 1$  s. The maximum recorded looped state duration  
227 is, however, limited by the duration of our measurement (200 s) and the duration of the fluorescent  
228 state of the fluorophores before photobleaching. The value of the exponential factor thus sets the  
229 lower limit of the looped state duration.

## 230 **DISCUSSION**

231 All characterized long Argonaute proteins interact with their RNA and/or DNA targets as monomers,  
232 binding a single copy of each guide and target nucleic acids. Surprisingly, we reveal here that AfAgo,  
233 a prokaryotic Argonaute from the hyperthermophilic archaeon *Archaeoglobus fulgidus*, follows a  
234 different mechanism, which involves homodimerization and simultaneous interaction with two guide-  
235 target nucleic acid duplexes.

236 First, we show that AfAgo is a homodimer in all previously solved X-ray structures, including apo-  
237 protein, and complexes with RNA and DNA (Supplementary table S4). Two types of AfAgo  
238 dimerization interfaces formed by the C-terminal  $\beta$ -sheets are observed in the structures. Both types



239 of interfaces bury a comparable solvent-accessible surface area (Supplementary table S4), but result  
240 in distinct arrangement of AfAgo subunits relative to one another, which we term 'closed' and 'open'  
241 dimers (Figure 1 A and B, respectively). The 'closed' type of AfAgo homodimer, formed when the  
242 interface involves both the N-terminal residues and the C-terminal  $\beta$ -strands (Figure 1A), provides a  
243 better fit to our SAXS data, suggesting that it is the major type of DNA-bound WT AfAgo dimer present  
244 in solution (Figure 1C). It remains to be determined if formation of the alternative 'open' dimer  
245 observed in several structures (Figure 1B and Supplementary table S4) was influenced by crystal  
246 packing, or rather it is an alternative less abundant arrangement of AfAgo subunits that co-exists in  
247 solution at equilibrium with the 'closed' form. As expected, removal of the  $\beta$ -strands located at the  
248 intersubunit interface (variant AfAgo $\Delta$ ) renders AfAgo incapable of dimerization (Figure 1).

249 Simultaneous binding of WT AfAgo homodimer to both ends of a linear DNA fragment would result in  
250 a DNA loop. Formation of such looped DNA molecules upon incubation with WT AfAgo was directly  
251 visualized using AFM (Figure 2); as shown in Table 1, they constitute the majority of all protein-DNA  
252 complexes detected. As expected, very few looped DNA molecules were observed in similar  
253 experiments performed with the dimerization mutant AfAgo $\Delta$  (Table 1). Thus, AFM provides further  
254 proof that homodimeric WT AfAgo is capable of simultaneous interaction with two DNA ends, while the  
255 dimerization mutant AfAgo $\Delta$ , being a monomer, binds just one DNA end.

256 To further characterize the interaction of WT AfAgo with DNA in solution, we have performed single-  
257 molecule FRET measurements (Figure 3) using a 569 bp DNA fragment labelled with different  
258 fluorescent labels (a FRET pair) close to DNA ends. Design of the DNA substrate ensured that binding  
259 of WT AfAgo dimer to both DNA ends would bring the fluorophores into close proximity, resulting in  
260 FRET. Comparison of donor/acceptor channel records for free DNA and DNA with either WT AfAgo or  
261 dimerization-incapable AfAgo $\Delta$  confirmed that WT AfAgo forms DNA loops, and that loop formation  
262 requires AfAgo dimerization.

263 At least two mechanisms can be proposed for the formation of the WT AfAgo dimer / looped DNA  
264 complex. The first mechanism is valid if apo-WT AfAgo forms a stable dimer. The reaction (Figure 5)  
265 proceeds via (i) association of free DNA (species '0') with a single WT AfAgo dimer, which binds to  
266 one DNA end (species '1'); (ii) capture of the second DNA terminus by the DNA-bound AfAgo in an  
267 intramolecular reaction, resulting in a looped complex (species '2'); (iii) alternatively, association of the  
268 second WT AfAgo dimer with the unoccupied target (the second DNA end) of species '1' leads to

269 species '3', which is no longer capable of loop formation. Such mechanism was demonstrated for  
270 many proteins capable of DNA looping, including restriction endonucleases [21–23] and transposases  
271 [24–27]. The second mechanism is valid if apo-WT AfAgo is a monomer in solution, and dimerizes  
272 only upon binding to DNA. In such a case the following steps lead to a looped complex: (i) a single  
273 AfAgo monomer binds the first DNA end (species '4', Figure 5); (ii) the second AfAgo monomer binds  
274 the second end (species '5'); (iii) two DNA-bound monomers associate forming the looped complex '2'  
275 (Figure 5). Such mechanism is less common, albeit it was also demonstrated for some nucleic acid  
276 enzymes [28]. Single molecule FRET experiments in solution allowed us to distinguish the two above  
277 mechanisms. We have found that the amount of the looped (high-FRET) complex is dependent on  
278 AfAgo concentration. It increases until an optimal protein concentration is reached (approx. 1 nM  
279 dimer in our experimental setup, Figure 3D), and steeply declines upon further increase in WT AfAgo  
280 concentration. Such behavior is expected only for the mechanism involving homodimeric WT AfAgo  
281 (species '0', '1', '2', and '3', Figure 5), as excessive protein concentrations favor binding of two WT  
282 AfAgo dimers to both DNA ends (species '3'), and thereby hinder loop formation. No such loop  
283 disruption at increased protein concentrations is expected for the second mechanism involving  
284 monomeric apo-WT AfAgo (species '0', '4', '5', and '2'), as the species favored at the highest protein  
285 concentrations ('5') is still capable of loop formation. Taken together, our single-molecule studies in  
286 solution favor the DNA looping mechanism involving a stable apo-WT AfAgo dimer (species '0', '1', '2',  
287 '3', Figure 5), a finding that is also consistent with SAXS measurements of apo-WT AfAgo (Table 1,  
288 Figure 1C). However, we cannot completely rule out mixed mechanisms involving an equilibrium of  
289 monomeric and dimeric apo-WT AfAgo forms and DNA simultaneously bound to both monomeric and  
290 dimeric AfAgo proteins (species '6', Figure 5).

291 Single-molecule measurements on immobilized DNA allowed us to assess the dynamic properties of  
292 WT AfAgo-induced DNA loops. We find that (i) the DNA loops induced by WT AfAgo are relatively  
293 stable, with the lower limit estimate for the loop duration exceeding 30 s (Supplementary figure S6C);  
294 (ii) the proximity ratio  $E$  of the looped complexes changes over time, suggesting intrinsic dynamics of  
295 the AfAgo dimer, presumably attributable to the flexible dimerization interface (Supplementary figure  
296 S6D).

## 297 **CONCLUSIONS**

298 The ability of WT AfAgo to form homodimers and bring two nucleic acid fragments into close proximity,  
299 to the best of our knowledge, is unique among Argonaute proteins, and raises additional questions  
300 regarding the currently unknown AfAgo function. Simultaneous interaction with two target sites in the  
301 case of restriction endonucleases is believed to increase specificity by preventing inadvertent  
302 cleavage of lone unmodified target sites [23, 29]. However, since AfAgo has no intrinsic nuclease  
303 activity, it cannot be directly involved in host defense against invading nucleic acids, as recently  
304 proposed for the catalytically active full-length pAgos [30, 31]. Instead, the ability of WT AfAgo to form  
305 stable synaptic complexes with two DNA ends is reminiscent of transposases [24–27], Cas1-Cas2  
306 integrases [32, 33], and (retro)viral integrases [34, 35], which often bring the reactive 3'-OH groups of  
307 two DNA ends into proximity of the integration site. AfAgo thus could serve as the recognition module  
308 for the integrated DNA fragment; target DNA recognition, binding and catalysis of the integration  
309 reactions would require involvement of additional, currently unknown, partner proteins. In order to test  
310 this hypothesis, we currently perform structural and functional studies of other AfAgo-like short  
311 prokaryotic Argonautes, and also try to identify and characterize their putative partners.

## 312 **METHODS**

### 313 **Protein expression**

314 The gene encoding WT AfAgo was amplified from *Archaeoglobus fulgidus* genomic DNA by PCR and  
315 cloned into a pETDuet vector, yielding a construct with an N-terminal (His)<sub>6</sub> tag (N-terminal protein  
316 sequence MGSSHHHHHSQDP followed by 1-427 aa of WT AfAgo sequence). The deletion in the  
317 dimerization mutant AfAgo $\Delta$  was constructed via overlap extension PCR by using two primer pairs,  
318 MZ-385/MZ-875 and MZ-383/MZ-876 (Supplementary table S1) for the N- and C-terminal fragments  
319 flanking the region to be deleted, respectively. The two PCR products, possessing a 49 bp overlap,  
320 were then used as a template for subsequent PCR with the MZ-383/MZ-385 primers, yielding the full-  
321 length fragment, which was then cloned into a pETDuet vector. Both proteins were expressed in *E.*  
322 *coli* strain BL21(DE3). Cells were grown in LB broth in the presence of ampicillin at 37 °C. When A600  
323 of the cell culture reached 0.5, the incubation temperature was lowered to 16 °C, 0.1 mM IPTG were  
324 added, cells incubated for approx. 16 hours at 16 °C and harvested by centrifugation.

### 325 **Protein purification**

326 Harvested cells expressing (His)<sub>6</sub>-tagged WT AfAgo or the dimerization mutant AfAgo $\Delta$  were disrupted  
327 by sonication in buffer A (20 mM Tris–HCl (pH 8.0 at 25 °C), 500 mM mM NaCl, 5 mM  
328 mercaptoethanol) with 2 mM PMSF (phenylmethylsulfonyl fluoride), incubated for 20 min at 50 °C and  
329 cell debris was removed by centrifugation at 48,400 x g for 1 hour. The supernatant was loaded onto  
330 a HiTrap chelating HP column charged with Ni<sup>2+</sup> (GE Healthcare) and eluted with a linear gradient  
331 (15-500 mM) of imidazole in buffer A. The fractions containing protein were pooled, diluted to 0.2 M of  
332 NaCl with a buffer containing 20 mM Tris–HCl (pH 8.0 at 25 °C), 10% glycerol, 5 mM 2-  
333 mercaptoethanol and incubated for 1 h at 37 °C with 1 mM EDTA (ethylenediaminetetraacetic acid)  
334 and RNase A/T1 (ThermoFisher Scientific) (1:100). Next, the protein solution was centrifuged at  
335 48,400 x g for 30 minutes, the supernatant containing RNA-free AfAgo was loaded onto a HiTrap  
336 Heparin HP column (GE Healthcare), and eluted using a 0.2 – 1.0 M NaCl gradient. Finally, the  
337 protein was run through the HiLoad 16/600 Superdex 200 column (GE Healthcare) in buffer A and  
338 dialyzed against 20 mM Tris–HCl (pH 8.0 at 25 °C), 500 mM NaCl, 50% glycerol.

### 339 **Small angle X-ray scattering**

340 Small angle scattering data of WT AfAgo and monomeric mutant were collected at the P12 EMBL  
341 beamline on the PETRA III ring of the DESY synchrotron in Hamburg, Germany [36]. Details of data  
342 collection and principal structural parameters are presented in Supplementary table S2 and  
343 Supplementary figure S1. Protein complexes with DNA (MZ-1289) were transferred to sample buffer  
344 (20 mM Tris-HCl (pH 7.5 at 25 °C), 5 mM MgCl<sub>2</sub>, 150 mM NaCl and 2 mM 1,4-dithiothreitol) using  
345 Illustra NAP columns (GE Healthcare). Apo AfAgo sample was measured in the same buffer  
346 containing 500 mM NaCl.

347 Dimeric AfAgo complex with MZ-1289 was analyzed by SEC-SAXS with FPLC (Agilent) using Wyatt-  
348 MALLS-DLS detection system. The AfAgo+MZ-1289 was concentrated to 175  $\mu$ M and loaded on the  
349 column Superdex 200 Increase 10/300 (GE Healthcare) equilibrated with the sample buffer. Frames  
350 collected during the complete SEC run (flow rate 0.5 ml/min, 3000 frames) were analyzed with  
351 CHROMIXS [37], frames corresponding to the peak were averaged and processed. *Ab initio* shape  
352 determination was carried out by generating 20 independent DAMMIF [38] models using  
353 parameterized scattering curves created by GNOM [39] under P2 symmetry restraints. Models were  
354 clustered by DAMCLUST [40] and models forming a cluster were averaged by DAMAVER [41] and  
355 used as a starting model for an additional run of DAMMIN [42].

356 SAXS measurements performed with a range of AfAgo $\Delta$  concentrations (1-10 mg/ml, both the apo-  
357 form and a complex with MZ-1289 DNA), showed significant protein aggregation, particularly  
358 pronounced with the apo-AfAgo $\Delta$ . The pseudo-chain dummy residues models of the complex  
359 generated by GASBOR [43] were superimposed with crystallographic dimers of AfAgo as well as with  
360 the monomeric AfAgo-DNA complex using SUPCOMB [44] applying step-wise shift (5 Å) along the  
361 principal axis of the model as described in [45].

362 Comparison of the SAXS data with crystal structures was carried out by CRY SOL [46] (Figure 1).  
363 Particle volume and MW estimations were performed using several methods (Supplementary table S3  
364 and references therein).

### 365 **DNA fragments**

366 DNA fragments were assembled and prepared as depicted in Supplementary figure S2. All full-length  
367 DNA fragments were subsequently purified from an agarose gel using a runVIEW system (Clever  
368 Scientific, UK), precipitated with sodium acetate/isopropanol, washed with 75% ethanol and  
369 resuspended in water.

### 370 **AFM sample preparation and imaging**

371 DNA-protein complexes were formed by incubating the DNA fragment (5 nM) with WT AfAgo or  
372 AfAgo $\Delta$  (concentration in terms of monomer 50 nM) for 5 min at room temperature in the Binding  
373 Buffer HEPES (33 mM HEPES (pH 7.8 at 25 °C), 66 mM CH<sub>3</sub>COOK, 5 mM (CH<sub>3</sub>COO)<sub>2</sub>Mg,) in a total  
374 volume of 50  $\mu$ l. Next, the protein-DNA complexes were cross-linked with 2.5% glutaraldehyde for  
375 20 min. Glutaraldehyde was then quenched with an excess of the Tris buffer (33 mM Tris-acetate  
376 (pH 7.8 at 25 °C), 66 mM CH<sub>3</sub>COOK, 5 mM (CH<sub>3</sub>COO)<sub>2</sub>Mg,). The resultant reaction solution after 10-  
377 fold dilution with Tris buffer was deposited onto modified mica at room temperature as described  
378 below.

379 Freshly cleaved muscovite mica (grade IV, SPI supplies Inc., USA) was incubated in a mixture of 1-(3-  
380 aminopropyl)-silatrane (APS) solution for 30 min to prepare functionalized APS-mica, as described  
381 previously for the preparation of protein-DNA complexes [47]. 50  $\mu$ l of DNA-protein complex solution  
382 was deposited on APS-mica for 5 min. After incubation the mica surface was immersed into deionized  
383 water for 5 min, flushed with excess water and then dried under a flow of nitrogen. The images were  
384 acquired in the air with 'DimensionIcon' (Bruker, Santa Barbara, CA) microscope system in tapping

385 mode. Probes with nominal spring constants of ~ 5 or 40 N/m were used. Typically, the images were  
386 collected at a speed of 0.6 Hz and a resolution of 1024 × 1024 pixels, scan size 2 μm × 2 μm.

### 387 **Single-molecule fluorescence microscopy**

388 The overall idea of fluorescence burst data acquisition of single diffusing molecules in alternating laser  
389 excitation (ALEX) mode was based on [48]. The principal opto-mechanical layout of the experiment is  
390 shown in Supplementary figure S3 and described in Supplementary Methods.

391 The measurement of single surface-immobilized molecules with the excitation in the total internal  
392 reflection mode (TIR) was performed on the same setup exploiting its alternative functionality as  
393 described previously [21]. Briefly, the objective was 100× 1.4 Oil Plan Apo VC (Nikon), the  
394 fluorescence signal was split by T640lpxr-UF2 dichroic mirror (Chroma) and the different spectral  
395 channels were projected on the same EMCCD (DU-897ECS0-UVB, Andor).

### 396 **Sample cell preparation for single molecule measurements**

397 FRET bursts measurements were performed in a chambered coverglass well (155411, Nunc Lab-Tek,  
398 Thermo Scientific). The reaction volume was 200 μl. The reaction buffer (RB) was 33 mM Tris-acetate  
399 (pH 7.9 at 20 °C), 66 mM CH<sub>3</sub>COOK, 5 mM (CH<sub>3</sub>COO)<sub>2</sub>Mg, and 0.1 mg/ml BSA (bovine serum  
400 albumin). The DNA concentration was 17-50 pM. Measurements at different protein concentrations  
401 were carried out by adding to the reaction small volumes of protein diluted in RB in 'Protein LoBind'  
402 1.5 mL tubes (Eppendorf). No oxygen-scavenging or triplet-quenching additives were used.

403 Measurements of surface-immobilized DNA fragments were performed in a flow cell assembled from  
404 a six-channel Sticky-Slide VI 0.4 (Ibidi) and a coverslip functionalized with PEG (polyethylene glycol)  
405 derivatives as described in detail in [21]. The flow cell was incubated with 5 μg/ml of Neutravidin  
406 (Molecular probes) in RB for 2 min, washed with RB, incubated with 5 pM DNA in RB until the density  
407 of the surface-immobilized DNA fragments appeared to be appropriate, and washed with RB. For the  
408 measurement, 10 nM solution of AfAgo in RB supplemented with 1% glucose (TCI Europe), 2.5 mM  
409 Trolox (Sigma-Aldrich), and 15 U/ml glucose oxidase (Sigma-Aldrich) was injected into the cell. Trolox  
410 was treated with UV light for 20 min according to Cordes et al. [49]. Single molecule data analysis  
411 was performed as described in Supplementary Methods.

412

413 **DECLARATIONS**

414 **Funding**

415 This work was supported by the Research Council of Lithuania [S-MIP-17-61 to M.Z.]. The access to  
416 P12 was supported by the Horizon 2020 programme of the European Union, iNEXT (H2020 Grant #  
417 653706). Funding for open access charge: the Research Council of Lithuania.

418 **Autors' contributions**

419 AS purified the target proteins. EM performed the SAXS measurements and crystallographic analysis.  
420 DR and EG performed smFRET experiments. MJ performed AFM measurements. GS, DR, EM and  
421 EG drafted the manuscript. MZ designed and coordinated the study, and critically edited the  
422 manuscript. All authors read and approved the final manuscript.

423 **Acknowledgement**

424 Authors gratefully acknowledge prof. Virginijus Siksnys for fruitful discussions and comments on the  
425 manuscript. Authors also acknowledge Audra Ruksenaite for mass spectrometry of AfAgo proteins,  
426 Tomas Urbaitis for generation of the dimerization mutant AfAgo $\Delta$  and initial experiments, and prof.  
427 Gintaras Valincius for support. The synchrotron SAXS data was collected at beamline P12 operated  
428 by EMBL Hamburg at the PETRA III storage ring (DESY, Hamburg, Germany). We would like to thank  
429 Dr. Melissa Graewert for the assistance in using the beamline.

430 **Competing interests**

431 None of the authors have any competing interests.

432 **REFERENCES**

- 433 1. Song J-J, Smith SK, Hannon GJ, Joshua-Tor L. Crystal Structure of Argonaute and Its Implications  
434 for RISC Slicer Activity. *Science* (80- ). 2004;305:1434–7. doi:10.1126/science.1102514.
- 435 2. Kwak PB, Tomari Y. The N domain of Argonaute drives duplex unwinding during RISC assembly.  
436 *Nat Struct Mol Biol*. 2012;19:145–51.
- 437 3. Pratt AJ, MacRae IJ. The RNA-induced silencing complex: A versatile gene-silencing machine. *J*  
438 *Biol Chem*. 2009;284:17897–901.
- 439 4. Ryazansky S, Kulbachinskiy A, Aravin AA. The Expanded Universe of Prokaryotic Argonaute  
440 *Proteins*. *MBio*. 2018;9:1–20.



- 441 5. Swarts DC, Makarova K, Wang Y, Nakanishi K, Ketting RF, Koonin E V., et al. The evolutionary  
442 journey of Argonaute proteins. *Nat Struct Mol Biol.* 2014;21:743–53.
- 443 6. Lisitskaya L, Aravin AA, Kulbachinskiy A. Supplementary information - DNA interference and  
444 beyond: structure and functions of prokaryotic Argonaute proteins. *Nat Commun.* 2018;9:1–12.
- 445 7. Boland A, Huntzinger E, Schmidt S, Izaurrealde E, Weichenrieder O. Crystal structure of the MID-  
446 PIWI lobe of a eukaryotic argonaute protein. *Proc Natl Acad Sci U S A.* 2011;108:10466–71.
- 447 8. Dayeh DM, Kruihoff BC, Nakanishi K. Structural and functional analyses reveal the contributions of  
448 the C- and N-lobes of Argonaute protein to selectivity of RNA target cleavage. *J Biol Chem.*  
449 2018;293:6308–25.
- 450 9. Frank F, Hauver J, Sonenberg N, Nagar B. Arabidopsis Argonaute MID domains use their  
451 nucleotide specificity loop to sort small RNAs. *EMBO J.* 2012;31:3588–95.  
452 doi:10.1038/emboj.2012.204.
- 453 10. Frank F, Sonenberg N, Nagar B. Structural basis for 5'-nucleotide base-specific recognition of  
454 guide RNA by human AGO2. *Nature.* 2010;465:818–22. doi:10.1038/nature09039.
- 455 11. Till S, Lejeune E, Thermann R, Bortfeld M, Hothorn M, Enderle D, et al. A conserved motif in  
456 Argonaute-interacting proteins mediates functional interactions through the Argonaute PIWI domain.  
457 *Nat Struct Mol Biol.* 2007;14:897–903.
- 458 12. Boland A, Tritschler F, Heimstädt S, Izaurrealde E, Weichenrieder O. Crystal structure and ligand  
459 binding of the MID domain of a eukaryotic Argonaute protein. *EMBO Rep.* 2010;11:522–7.
- 460 13. Parker JS, Roe SM, Barford D. Crystal structure of a PIWI protein suggests mechanisms for  
461 siRNA recognition and slicer activity. *EMBO J.* 2004;23:4727–37.
- 462 14. Ma JB, Yuan YR, Meister G, Pei Y, Tuschl T, Patel DJ. Structural basis for 5' -end-specific  
463 recognition of guide RNA by the *A. fulgidus* Piwi protein. *Nature.* 2005;434:666–70.
- 464 15. Parker JS, Roe SM, Barford D. Structural insights into mRNA recognition from a PIWI domain-  
465 siRNA guide complex. *Nature.* 2005;434:663–6.
- 466 16. Parker JS, Parizotto EA, Wang M, Roe SM, Barford D. Enhancement of the Seed-Target  
467 Recognition Step in RNA Silencing by a PIWI/MID Domain Protein. *Mol Cell.* 2009;33:204–14.  
468 doi:10.1016/j.molcel.2008.12.012.
- 469 17. Krissinel E, Henrick K. Inference of Macromolecular Assemblies from Crystalline State. *J Mol Biol.*  
470 2007;372:774–97.

- 471 18. Janin J, Chothia C. The structure of protein-protein recognition sites. *J Biol Chem.*  
472 1990;265:16027–30. <http://www.jbc.org/content/265/27/16027.short>.
- 473 19. Conte L Lo, Chothia C, Janin J. The atomic structure of protein-protein recognition sites. *J Mol*  
474 *Biol.* 1999;285:2177–98. doi:<https://doi.org/10.1006/jmbi.1998.2439>.
- 475 20. Hegge JW, Swarts DC, Chandradoss SD, Cui TJ, Kneppers J, Jinek M, et al. DNA-guided DNA  
476 cleavage at moderate temperatures by *Clostridium butyricum* Argonaute. *Nucleic Acids Res.*  
477 2019;47:5809–21.
- 478 21. Tutkus M, Sasnauskas G, Rutkauskas D. Probing the dynamics of restriction endonuclease  
479 NgoMIV-DNA interaction by single-molecule FRET. *Biopolymers.* 2017;107:1–9.
- 480 22. Lushnikov AY, Potaman VN, Oussatcheva EA, Sinden RR, Lyubchenko YL. DNA strand  
481 arrangement within the SfiI-DNA complex: Atomic force microscopy analysis. *Biochemistry.*  
482 2006;45:152–8.
- 483 23. Zaremba M, Sasnauskas G, Siksnyš V. The link between restriction endonuclease fidelity and  
484 oligomeric state: A study with Bse634I. *FEBS Lett.* 2012;586:3324–9.  
485 doi:10.1016/j.febslet.2012.07.009.
- 486 24. Pathania S, Jayaram M, Harshey RM. Path of DNA within the Mu transpososome: Transposase  
487 interactions bridging two Mu ends and the enhancer trap five DNA supercoils. *Cell.* 2002;109:425–36.
- 488 25. Peterson G, Reznikoff W. Tn5 transposase active site mutations suggest position of donor  
489 backbone DNA in synaptic complex. *J Biol Chem.* 2003;278:1904–9.
- 490 26. Hickman AB, Kailasan S, Genzor P, Haase AD, Dyda F. Casposase structure and the mechanistic  
491 link between DNA transposition and spacer acquisition by CRISPR-Cas. *Elife.* 2020;9:1–26.
- 492 27. Pouget N, Turlan C, Destainville N, Salomé L, Chandler M. IS911 transpososome assembly as  
493 analysed by tethered particle motion. *Nucleic Acids Res.* 2006;34:4313–23.
- 494 28. Rutkauskas D, Petkelyte M, Naujalis P, Sasnauskas G, Tamulaitis G, Zaremba M, et al.  
495 Restriction enzyme Ecl18kI-induced DNA looping dynamics by single-molecule FRET. *J Phys Chem*  
496 *B.* 2014;118:8575–82.
- 497 29. Bellamy SRW, Mina P, Retter SE, Halford SE. Fidelity of DNA Sequence Recognition by the SfiI  
498 Restriction Endonuclease Is Determined by Communications between Its Two DNA-Binding Sites. *J*  
499 *Mol Biol.* 2008;384:557–63. doi:10.1016/j.jmb.2008.09.057.
- 500 30. Swarts DC, Jore MM, Westra ER, Zhu Y, Janssen JH, Snijders AP, et al. DNA-guided DNA

- 501 interference by a prokaryotic Argonaute. *Nature*. 2014;507:258–61.
- 502 31. Olovnikov I, Chan K, Sachidanandam R, Newman DK, Aravin AA. Bacterial Argonaute Samples  
503 the Transcriptome to Identify Foreign DNA. *Mol Cell*. 2013;51:594–605.  
504 doi:10.1016/j.molcel.2013.08.014.
- 505 32. Wright A V, Liu J-J, Knott GJ, Doxzen KW, Nogales E, Doudna JA. Structures of the CRISPR  
506 genome integration complex. *Science* (80- ). 2017;357:1113 LP – 1118.  
507 doi:10.1126/science.aao0679.
- 508 33. Xiao Y, Ng S, Hyun Nam K, Ke A. How type II CRISPR-Cas establish immunity through Cas1-  
509 Cas2-mediated spacer integration. *Nature*. 2017;550:137–41. doi:10.1038/nature24020.
- 510 34. Hare S, Gupta SS, Valkov E, Engelman A, Cherepanov P. Retroviral intasome assembly and  
511 inhibition of DNA strand transfer. *Nature*. 2010;464:232–6.
- 512 35. Grawenhoff J, Engelman AN. Retroviral integrase protein and intasome nucleoprotein complex  
513 structures. *World J Biol Chem*. 2017;8:32.
- 514 36. Blanchet CE, Spilotros A, Schwemmer F, Graewert MA, Kikhney A, Jeffries CM, et al. Versatile  
515 sample environments and automation for biological solution X-ray scattering experiments at the P12  
516 beamline (PETRA III, DESY). *J Appl Crystallogr*. 2015;48:431–43.
- 517 37. Panjkovich A, Svergun DI. CHROMIXS: Automatic and interactive analysis of chromatography-  
518 coupled small-angle X-ray scattering data. *Bioinformatics*. 2018;34:1944–6.
- 519 38. Franke D, Svergun DI. DAMMIF, a program for rapid ab-initio shape determination in small-angle  
520 scattering. *J Appl Crystallogr*. 2009;42:342–6.
- 521 39. Svergun DI. Determination of the regularization parameter in indirect-transform methods using  
522 perceptual criteria. *J Appl Crystallogr*. 1992;25:495–503.
- 523 40. Petoukhov M V., Franke D, Shkumatov A V., Tria G, Kikhney AG, Gajda M, et al. New  
524 developments in the ATSAS program package for small-angle scattering data analysis. *J Appl*  
525 *Crystallogr*. 2012;45:342–50.
- 526 41. Volkov V V., Svergun DI. Uniqueness of ab initio shape determination in small-angle scattering. *J*  
527 *Appl Crystallogr*. 2003;36:860–4. doi:10.1107/S0021889803000268.
- 528 42. Svergun DI. Restoring low resolution structure of biological macromolecules from solution  
529 scattering using simulated annealing. *Biophys J*. 1999;76 June:2879–86.  
530 <http://linkinghub.elsevier.com/retrieve/pii/S0006349599774436>.

- 531 43. Svergun DI, Petoukhov M V., Koch MHJ. Determination of domain structure of proteins from x-ray  
532 solution scattering. *Biophys J.* 2001;80:2946–53.
- 533 44. Kozin MB, Svergun DI. Automated matching of high- and low-resolution structural models. *J Appl*  
534 *Crystallogr.* 2001;34:33–41.
- 535 45. Tamulaitis G, Kazlauskienė M, Manakova E, Venclovas Č, Nwokeoji AO, Dickman MJ, et al.  
536 Programmable RNA Shredding by the Type III-A CRISPR-Cas System of *Streptococcus*  
537 *thermophilus*. *Mol Cell.* 2014;56:506–17.
- 538 46. Svergun D, Barberato C, Koch MHJ. CRY SOL - a Program to Evaluate X-ray Solution Scattering  
539 of Biological Macromolecules from Atomic Coordinates. *J Appl Crystallogr.* 1995;28:768–73.
- 540 47. Lyubchenko YL, Shlyakhtenko LS, Ando T. Imaging of nucleic acids with atomic force microscopy.  
541 *Methods.* 2011;54:274–83. doi:10.1016/j.ymeth.2011.02.001.
- 542 48. Kapanidis AN, Lee NK, Laurence TA, Doose S, Margeat E, Weiss S. Fluorescence-aided  
543 molecule sorting: Analysis of structure and interactions by alternating-laser excitation of single  
544 molecules. *Proc Natl Acad Sci U S A.* 2004;101:8936–41. doi:10.1073/pnas.0401690101.
- 545 49. Cordes T, Vogelsang J, Tinnefeld P. On the mechanism of trolox as antibleaching and antibleaching  
546 reagent. *J Am Chem Soc.* 2009;131 iv:5018–9.
- 547 50. Laskowski RA, Jablonska J, Pravda L, Vareková RS, Thornton JM. PDBsum: Structural  
548 summaries of PDB entries. *Protein Sci.* 2017;27:129–34.
- 549 51. Ingargiola A, Lerner E, Chung SY, Weiss S, Michalet X. FRET Bursts: An open source toolkit for  
550 analysis of freely-diffusing Single-molecule FRET. *PLoS One.* 2016;11:1–27.
- 551 52. Holden SJ, Uphoff S, Hohlbein J, Yadin D, Le Reste L, Britton OJ, et al. Defining the Limits of  
552 Single-Molecule FRET Resolution in TIRF Microscopy. *Biophys J.* 2010;99:3102–11.
- 553 53. Durand D, Vivès C, Cannella D, Pérez J, Pebay-Peyroula E, Vachette P, et al. NADPH oxidase  
554 activator p67phox behaves in solution as a multidomain protein with semi-flexible linkers. *J Struct*  
555 *Biol.* 2010;169:45–53. doi:10.1016/j.jsb.2009.08.009.
- 556 54. Chandran S. Rapid Assembly of DNA via Ligase Cycling Reaction (LCR). In: Hughes RA, editor.  
557 *Synthetic DNA: Methods and Protocols.* New York, NY: Springer New York; 2017. p. 105–10.  
558 doi:10.1007/978-1-4939-6343-0\_8.
- 559 55. Konarev P V., Volkov V V., Sokolova A V., Koch MHJ, Svergun DI. PRIMUS - a Windows-PC  
560 based system for small-angle scattering data analysis. *J Appl Crystallogr.* 2003;36:1277–82.

561 56. Fischer H, De Oliveira Neto M, Napolitano HB, Polikarpov I, Craievich AF. Determination of the  
562 molecular weight of proteins in solution from a single small-angle X-ray scattering measurement on a  
563 relative scale. J Appl Crystallogr. 2010;43:101–9.

564

## 565 TABLES AND FIGURES

566 **Table 1. AfAgo-DNA complexes observed by AFM.**

| Protein        | DNA loops, % | Linear                     |                              | Total number of analyzed complexes |
|----------------|--------------|----------------------------|------------------------------|------------------------------------|
|                |              | <i>Bound to one end, %</i> | <i>Bound to both ends, %</i> |                                    |
| WT AfAgo       | 55           | 29                         | 16                           | 208                                |
| AfAgo $\Delta$ | 12           | 29                         | 59                           | 319                                |

567

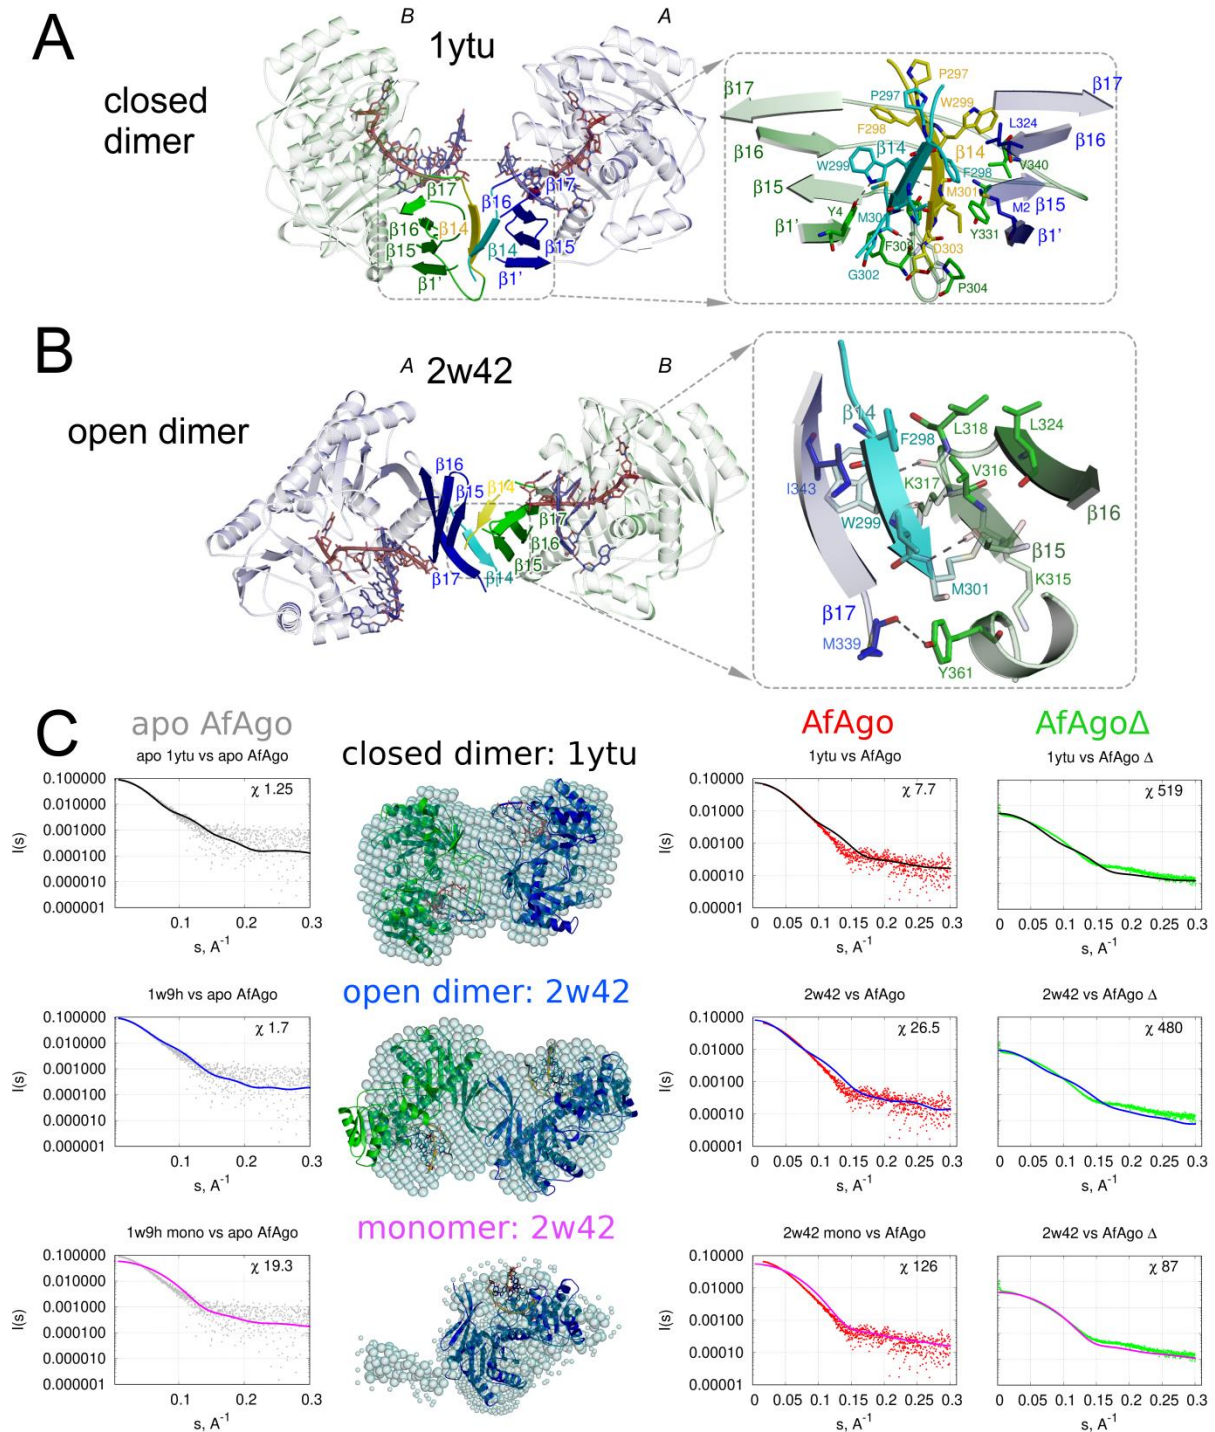

568

569 **Figure 1. Dimerization of AfAgo.** (A-B). Protein subunits are colored blue (protein chain A) and  
 570 green (protein chain B). The interface-forming secondary structure elements are highlighted and  
 571 numbered according to the PDB ID 2w42 assignment made by PDBsum [50]. The 'guide' DNA/RNA  
 572 strands bound by AfAgo are colored red, 'target' strands — blue. Residues 296-303 deleted in AfAgo $\Delta$   
 573 are colored cyan and yellow. Hydrogen bonds are shown as dashed lines. (A) AfAgo complex with  
 574 dsRNA (PDB ID 1ytu, both protein chains as present in ASU), the 'closed' dimer [14]. (B), AfAgo



575 complex with dsDNA (PDB ID 2w42, protein chain B is produced by operator  $(X, Y, Z + (-1 \ 2 \ 2) \{0 \ -1 \ -$   
576  $1\})$  [16]) - the 'open' dimer.  $\beta$ -strands from both subunits assemble into a closed  $\beta$ -barrel structure,  
577 with intersubunit interface formed by  $\beta$ 14 and  $\beta$ 15 strands of neighboring subunits. (C) SAXS data of  
578 WT AfAgo apo and complex with MZ-1289 DNA (grey and red points, respectively), and the  
579 dimerization mutant AfAgo $\Delta$  with MZ-1289 DNA (green points, right column) are compared with the  
580 scattering curves generated from the 'closed' dimer with or without dsRNA (PDB ID: 1ytu, black  
581 curves), 'open' dimer (PDB ID: 2w42 or 1w9h for apo AfAgo, blue curves) and monomeric apo and  
582 AfAgo-DNA complex (PDB ID: 2w42 or 1w9h, magenta curves) by CRYSOLO. Corresponding AfAgo  
583 structures are shown in the second column superimposed with the dummy atom models generated  
584 using the SAXS data of AfAgo complex with MZ-1289 oligoduplex.

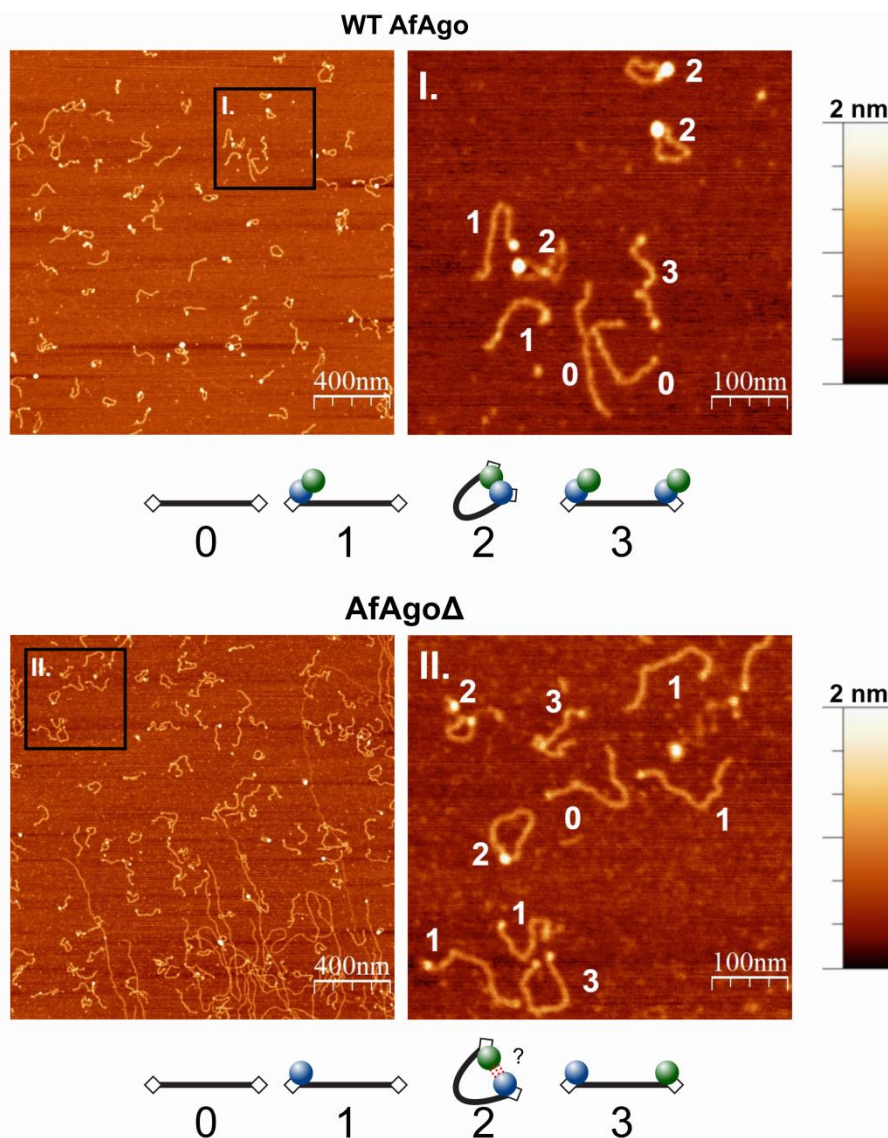

585



586 **Figure 2. Visualization of AfAgo-induced DNA loops by AFM.** Representative AFM images and  
587 enlarged views of DNA-protein complexes adsorbed to APS-mica acquired in the air are shown.  
588 DNA+WT AfAgo (top) and DNA + AfAgo $\Delta$  (bottom), area of each left column image is 4  $\mu\text{m}^2$ , scale bar  
589 is 400 nm. Right column shows regions marked by squares in the respective images on the left,  
590 enlarged 4-fold, scale bar 100 nm. Various observed species are depicted below the respective  
591 images and are marked as follows: '0' - naked DNA; '1' - protein bound to one DNA end; '3' - protein  
592 bound to both DNA ends; '2' - ring-shaped (looped) DNA. In the case of AfAgo $\Delta$ , species '2' is  
593 presumably formed due to glutaraldehyde crosslinking. The Z scale bar is 2 nm.

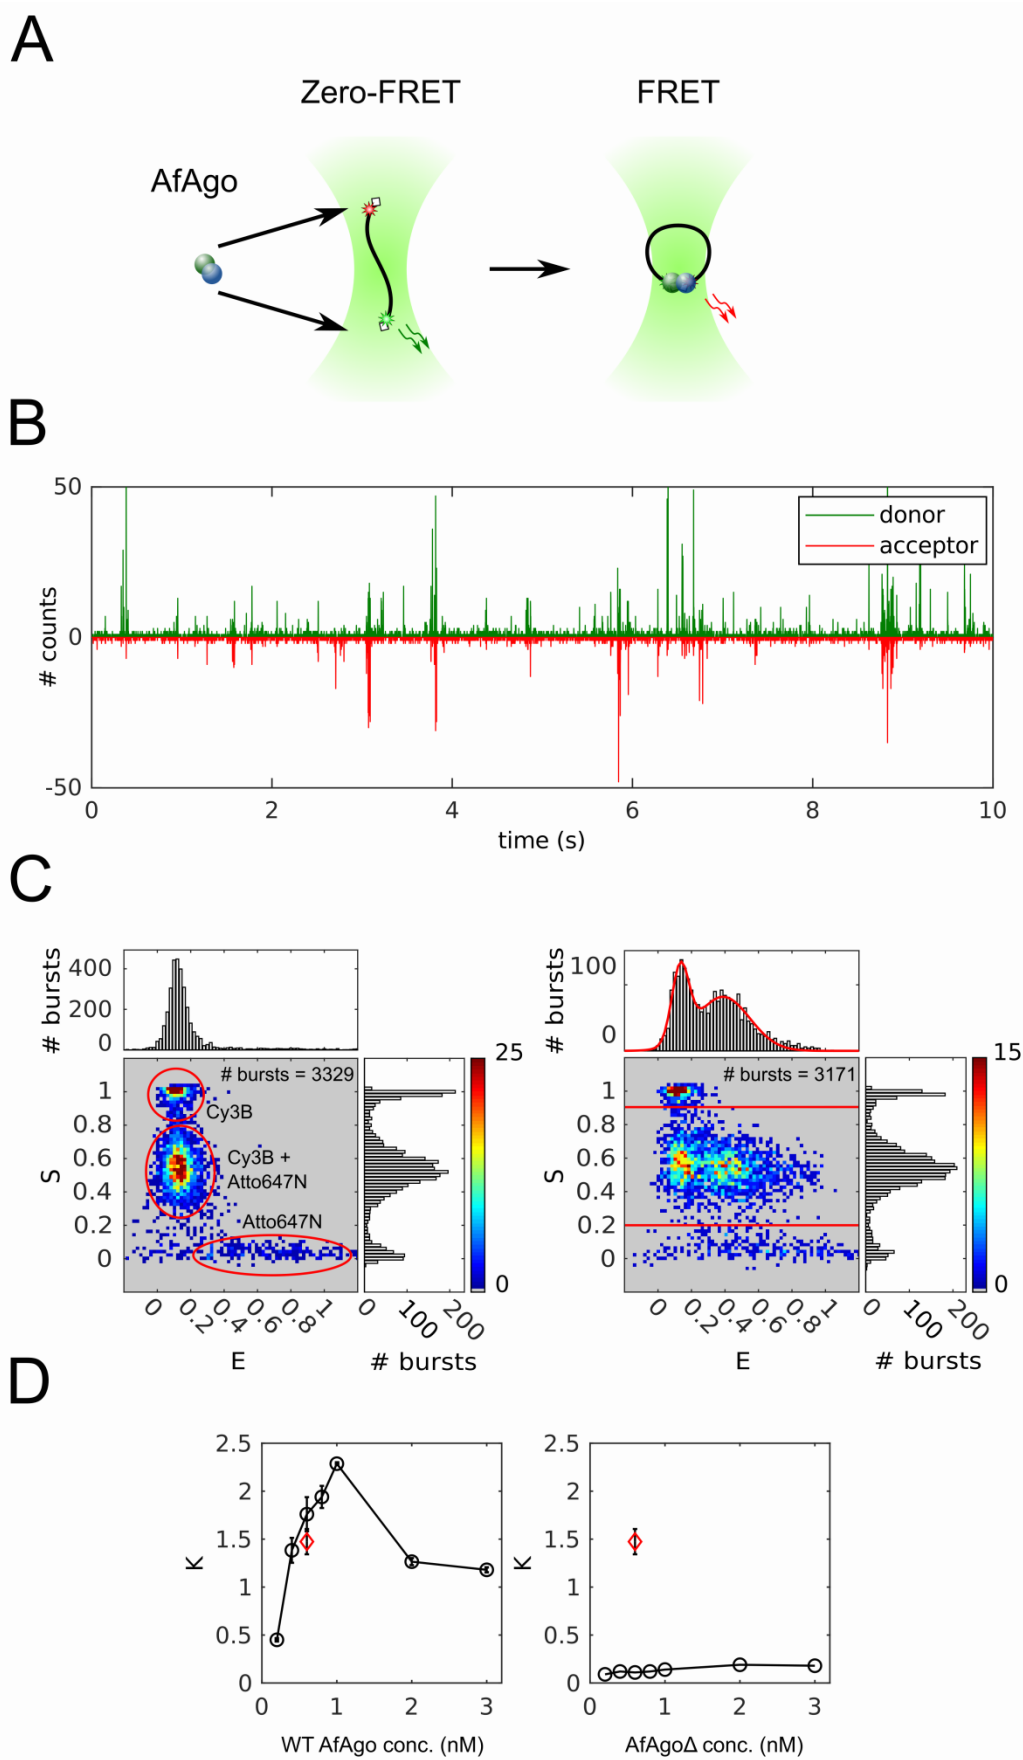

595 **Figure 3. Single-molecule studies of AfAgo-DNA interactions in solution.** (A) A schematic  
596 overview of the single molecule assay. Left, free DNA, right, DNA-WT AfAgo (blue and green circles)  
597 complex in a looped state. (B) Fluorescence intensity trace with 1 ms time bin of 25 pM DNA with  
598 1 nM AfAgo. Donor fluorescence upon donor excitation is presented in the upper part of the graph.  
599 Inverted acceptor fluorescence upon donor excitation is presented in the lower part of the graph. (C)  
600 Left - E-S histogram of DNA alone. The top and side axes contain, respectively, one-dimensional E  
601 (proximity ratio) and S (donor/acceptor stoichiometry) histograms of all bursts. Denoted are areas  
602 corresponding donor-only DNA, acceptor-only DNA, and dual-labeled DNA. Right – E-S histogram of  
603 DNA with 1 nM AfAgo. The one-dimensional E histogram on top is derived from bursts with S = 0.2-  
604 0.9, designated by horizontal lines in the E-S histogram. The red curve is a two-Gaussian fit to the  
605 data that gave the positions of the Gaussian maxima on the E-axis ( $0.13 \pm 0.01$  and  $0.39 \pm 0.02$ ). (D)  
606 Left - dependence of the ratio of looped and unlooped DNA molecules (parameter K) on WT AfAgo  
607 concentration (open circles). Right - the dependence of K on the AfAgo $\Delta$  concentration (open circles).  
608 The red diamonds in both graphs represent the competition experiment performed with 0.6 nM WT  
609 AfAgo dimer and 0.6 nM AfAgo $\Delta$  monomer. All data points are average values of three measurements  
610  $\pm 1$  standard deviation.

A

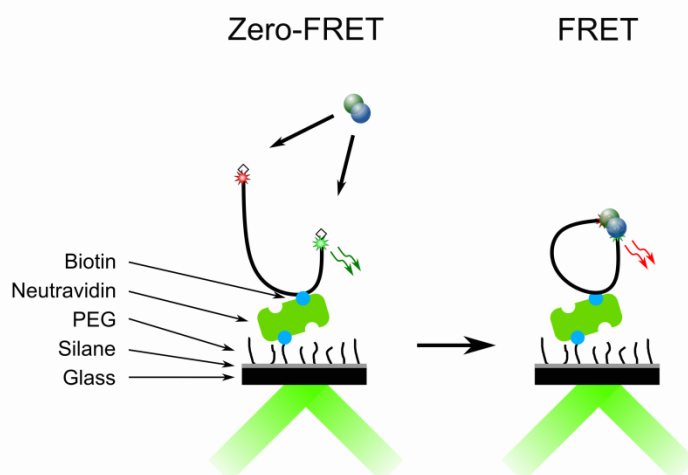

B

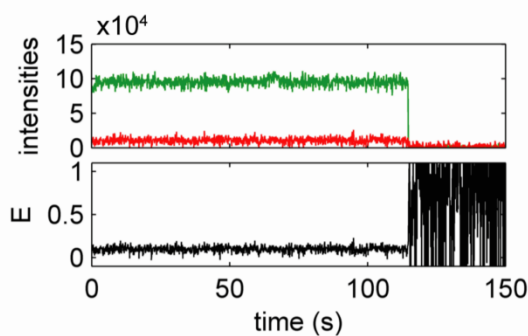

C

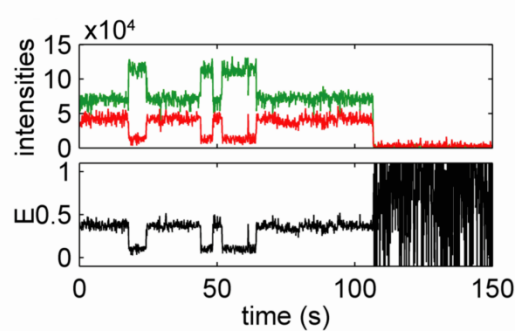

D

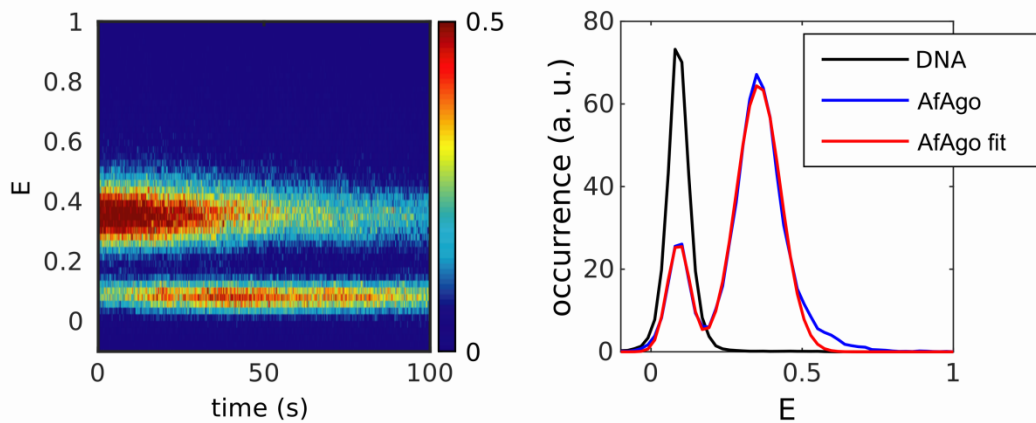

E

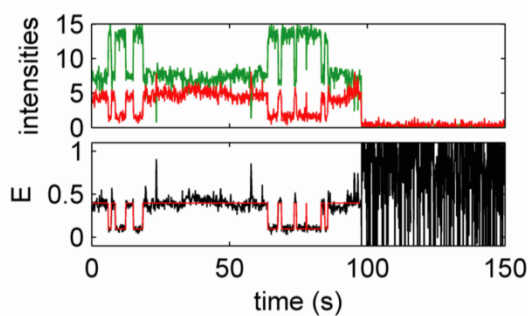

F

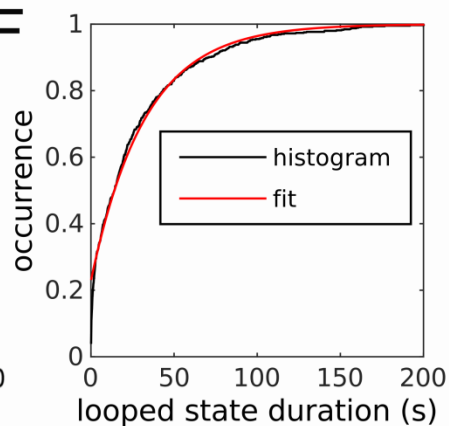

612 **Figure 4. Dynamics of WT AfAgo-induced DNA loops.** (A) A schematic overview of the single-  
613 molecule assay using TIRF microscopy. (B, C) Trajectories of donor (green) and acceptor (red)  
614 intensity and corresponding proximity ratio,  $E$ , of individual DNA fragments without (B) and with 10 nM  
615 AfAgo (C). (D) Left - an image of 287 pooled time traces of the proximity ratio,  $E$ , from the  
616 measurement with 10 nM of AfAgo. The image is normalized to the maximum image intensity. Right –  
617 a section of the image in the left integrated over the first 10 s shown with the two-Gaussian fit. The  
618 positions of the Gaussian maxima are  $0.09 \pm 0.01$  and  $0.36 \pm 0.01$ . For comparison a trace- and time-  
619 averaged section from the measurement of 227 traces on bare DNA is shown. (E) An example of  
620 trajectories of donor (green) and acceptor (red) intensity and corresponding proximity ratio,  $E$ , with  
621 HMM idealization of an individual DNA fragment with 10 nM AfAgo. F – cumulative histogram of the  
622 looped state durations from 287  $E$  traces with a single-exponential fit with the exponential factor of  
623  $33 \pm 1$  s.

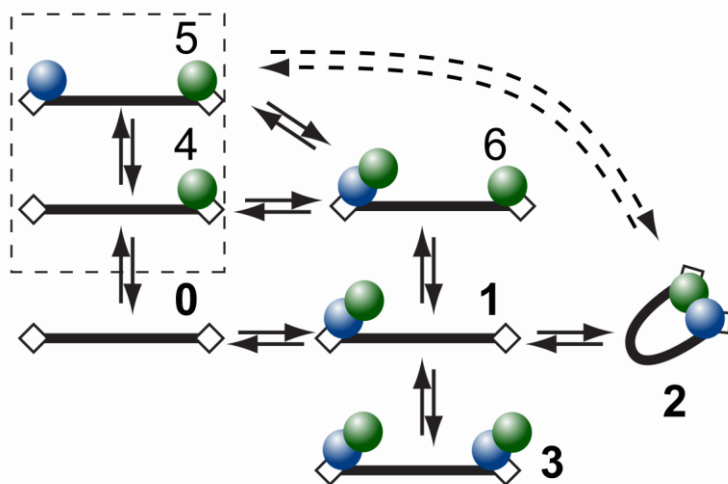

624

625 **Figure 5. Kinetic schemes depicting possible reaction pathways between two-target site DNA**  
626 **fragment and AfAgo.** Black bars represent DNA, rectangular boxes – AfAgo-binding targets (DNA  
627 ends), green and blue circles – AfAgo monomers. The 0-1-2-3 pathway represents the case of a  
628 stable AfAgo dimer and is supported by our experimental data. Pathway 0-4-5-2 represents the  
629 reactions that would occur if AfAgo was a monomer assembling into a dimer upon DNA binding.  
630 Dashed box represents species limited to AfAgo $\Delta$ .

631

632 **Prokaryotic Argonaute from *Archaeoglobus fulgidus* interacts with**  
633 **DNA as a homodimer**

634 Edvardas Golovinas<sup>1</sup>, Danielis Rutkauskas<sup>1,2</sup>, Elena Manakova<sup>1</sup>, Marija Jankunec<sup>1,3</sup>, Arunas  
635 Silanskas<sup>1</sup>, Giedrius Sasnauskas<sup>1</sup>, Mindaugas Zaremba<sup>1,\*</sup>

636 <sup>1</sup> Institute of Biotechnology, Life Sciences Center, Vilnius University, Sauletekio av. 7, LT-10257,  
637 Vilnius, Lithuania.

638 <sup>2</sup> Institute of Physics, Center for Physical Sciences and Technology, Savanoriu 231, LT-02300,  
639 Vilnius, Lithuania

640 <sup>3</sup> Institute of Biochemistry, Life Sciences Center, Vilnius University, Sauletekio av. 7, LT-10257,  
641 Vilnius, Lithuania.

642 \* To whom correspondence should be addressed. Tel: +370-5-2234357; Fax: +370-5-2234367; Email:  
643 zare@ibt.lt.

644

645 **Supplementary Information**

646

647 **SUPPLEMENTARY METHODS**

648 **Single molecule setup**

649 We used a custom single-molecule fluorescence microscopy setup built on a commercial inverted  
650 microscope Nikon Eclipse Ti-U equipped with 60× 1.2 WI Plan Apo VC objective (Nikon) used for the  
651 excitation and signal collection, two avalanche photodiode (APD)-based single photon counting  
652 modules (Tau-SPAD-50, PicoQuant) and 25 mW 532 and 635 nm diode-pumped solid state and diode  
653 lasers (Crystalaser), respectively. The laser excitation was reflected off a dichroic mirror  
654 (zt532/635rpc-XT, Chroma), and the fluorescence signal filtered off the excitation light with a  
655 quadruple-band interference filter (FF01-446/510/581/703, Semrock) and split into two spectral  
656 channels with a dichroic mirror (645dcxr, Chroma). ALEX was implemented by directly TTL-  
657 modulating the intensity of the 635 nm laser and synchronously modulating the intensity of the  
658 532 nm laser with a mechanical chopper (MC2000B, Thorlabs). The half period of ALEX was 50 μs.  
659 Fluorescence photon arrival times were recorded and ALEX was implemented using an FPGA module  
660 (PCIe-7851R, National Instruments) and custom Labview (National Instruments) program.

661 The excitation was focused 50 μm above the sample chamber glass surface. 532 nm excitation  
662 intensity was 30 μW, 635 nm - 20 μW. The size of the confocal pinhole was 75 μm. Each  
663 measurement was 10 min long.

## 664 **Single Molecule Data analysis**

665 Fluorescence burst analysis was performed using the freely available FRETbursts software [51]. The  
666 initial bursts search parameters were  $m = 10$  photons, and  $F = 6$  times the fluorescence background.  
667 The total intensity of a burst from both channels and excitation wavelengths was thresholded to be  
668 larger than 40 counts, and this yielded  $\sim 3000$  bursts from a 10 min measurement. Each burst was  
669 calculated a proximity ratio,  $E$ , according to  $E = I_d^a / (I_d^a + I_d^d)$ , here  $I_d^a$  and  $I_d^d$  are acceptor and donor  
670 intensities upon donor excitation, respectively, and stoichiometry parameter,  $S$ , according to  
671  $S = I_d / (I_d + I_a^a)$ , here  $I_d$  is the total donor and acceptor intensity upon donor excitation, and  $I_a^a$  is  
672 acceptor intensity upon acceptor excitation. Then we built 2D E-S histograms of bursts. Subsequently,  
673 bursts with stoichiometry parameter ranging from 0.2-0.9 were selected to build distributions of the  
674 proximity ratio,  $E$ , of bursts of DNA molecules labelled with both fluorophores only. E histograms were  
675 fit with the sum of two Gaussian functions using unconstrained optimization. Then the ratio of the  
676 number of looped and unlooped DNA molecules in the ensemble was calculated as the ratio of the  
677 area of the Gaussian of high  $E$  with that of low  $E$ .

678 The experiment of surface-immobilized DNA fragments was done by first recording a short movie with  
679 635 nm excitation to obtain a reference for fluorescent spot identification since the acceptor channel  
680 exhibits significantly less fluorescence background than the donor channel. Then a longer actual  
681 movie was recorded with the 532 nm excitation. The analysis of the two-spectral channel fluorescence  
682 movies was performed using custom software written in Matlab. Briefly, to identify the fluorescent  
683 spots, the first 20 frames of the reference and the actual fluorescence movies were averaged, the  
684 obtained average images were filtered with the 2D low-pass Gaussian filter 5 pixels large and with the  
685 standard deviation of 1 pixel and subtracted the same image filtered with the averaging filter 7 pixels  
686 large. The resulting acceptor channel reference image was thresholded with 20 and the donor  
687 channel actual image - with 40 counts/pixel. The obtained images were binarized for particle  
688 identification. Particles in both binary images were identified and filtered according to the following  
689 criteria: 5x5 pixel ROIs (regions of interest) centered on particles' centers of mass had to non-overlap,  
690 particle area had to be within 5-100 pixels range, particle eccentricity not larger than 0.8. The  
691 coordinates of a particle in the donor channel corresponding to a particle identified in the acceptor  
692 channel of the reference movie were calculated using the spatial transformation structure calculated  
693 from an image of surface-immobilized 200 nm fluorescent polystyrene beads (F8806, Invitrogen). For



694 trace extraction were considered only those particles in the actual movie whose donor coordinates  
695 coincided with the transformed coordinates of the acceptor particles in the reference movie within 1.5  
696 pixels. The donor and acceptor intensity traces were extracted using aperture photometry [52] with the  
697 background calculated as an average intensity from a 1 pixel-wide annulus around particle's ROI. The  
698 proximity ratio,  $E$ , was calculated according to the same formula as for the fluorescence bursts.  
699

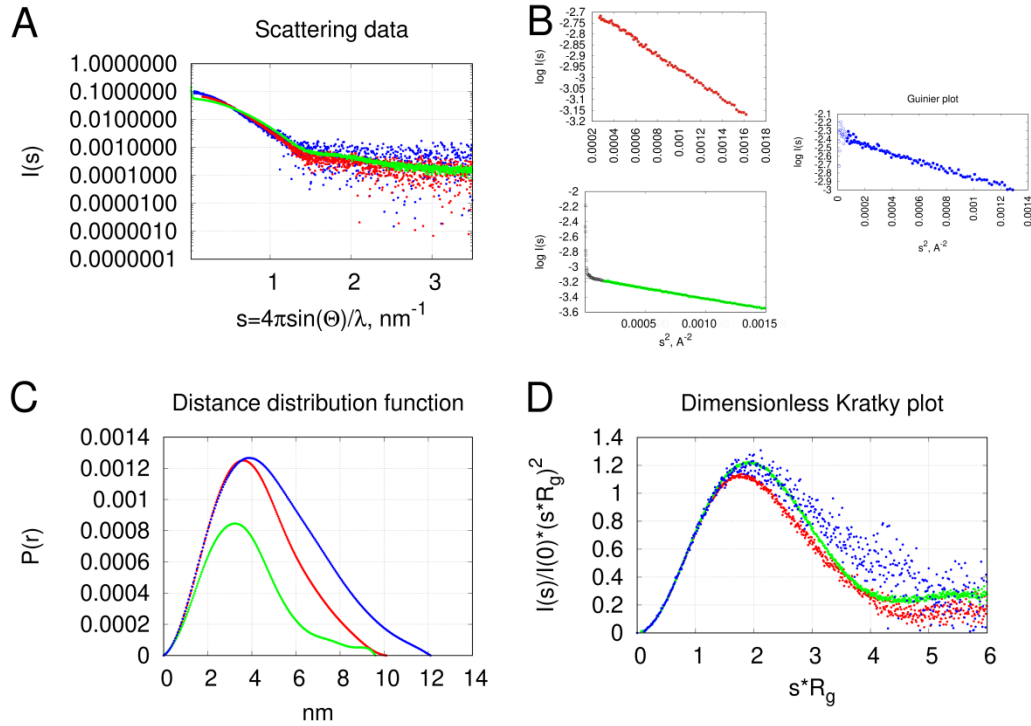

700

701 **Supplementary figure S1. SAXS data of AfAgo+MZ-1289 (red curves), monomeric mutant AfAgo $\Delta$ +MZ-**  
702 **1289 (green curves) complexes and apo AfAgo (blue curves).** (A), Scattering curves. (B), Guinier plots log  
703  $I(s)$  vs.  $s^2$  of the data at small  $s$  values. (C), Pair distance distribution functions. (D), Dimensionless Kratky  
704 representation of scattering data  $(I(s)/I(0) \cdot (s \cdot R_g)^2)$  vs.  $s \cdot R_g$ . All curves have similar shape typical for folded  
705 proteins [53].

706

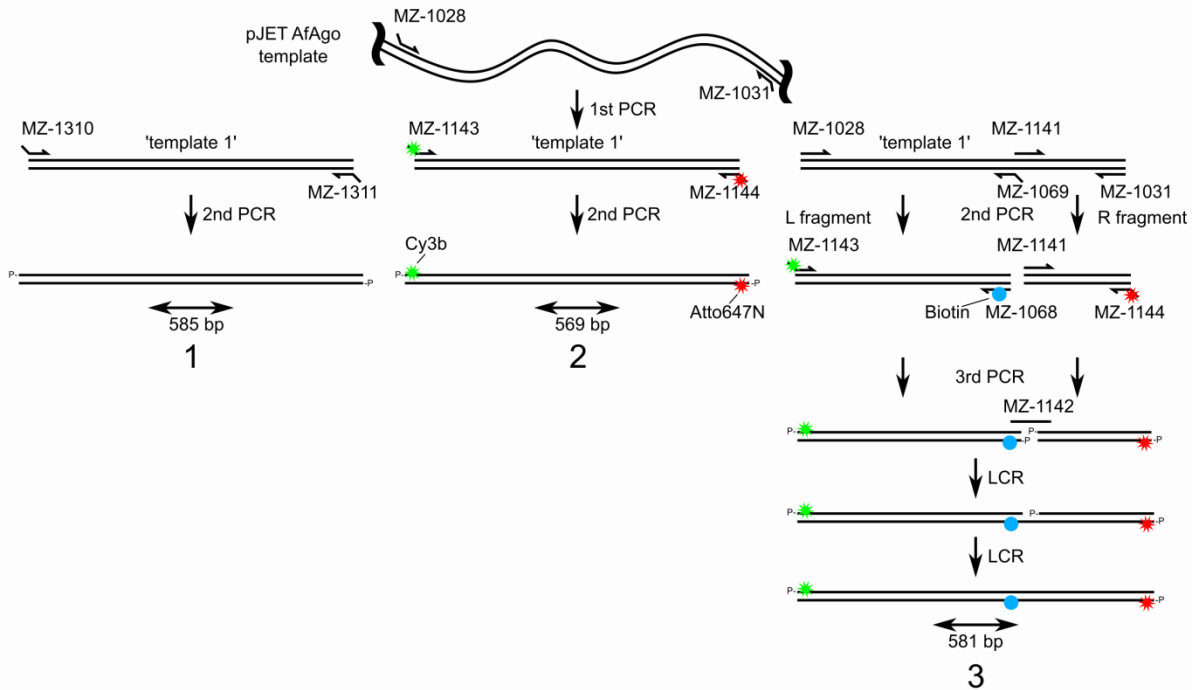

707

708 **Supplementary figure S2. Synthesis scheme for the DNA fragments.** First, a DNA fragment was amplified  
 709 from a pJET plasmid template containing an AfAgo gene fragment using oligonucleotides MZ-1028 and MZ-1031.  
 710 The PCR product was then used as a template (dubbed 'template 1') in subsequent reactions. Fragment '1' used  
 711 for AFM studies was made by PCR from 'template 1', using oligonucleotides MZ-1310 and MZ-1311, which were  
 712 treated with T4 polynucleotide kinase (PNK) prior to amplification, to yield a 585 bp fragment. Fragment '2' was  
 713 amplified from 'template 1' with oligonucleotides MZ-1143 and MZ-1144, bearing Cy3B (green star) and Atto647N  
 714 (red star) dyes, respectively, on the third base from the 5'-end, yielding 569 bp DNA. Fragment '3' was  
 715 synthesised in two steps. Firstly, respective fragments flanking the biotinylation site (dubbed 'L fragment' and 'R  
 716 fragment') were amplified by PCR from 'template 1', using primer pairs MZ-1028 and MZ-1069 for the 'L  
 717 fragment', and MZ-1031 and MZ-1141 for the 'R fragment'. Secondly, each of the two fragments were used as  
 718 templates for subsequent PCRs. 'L fragment' was amplified using MZ-1143 and MZ-1068, the latter bearing the  
 719 biotin (blue circle) on 22 b from its 5'-end. 'R fragment' was amplified using primers MZ-1141 and MZ-1144. The  
 720 two fragments were then purified using a GeneJET PCR purification kit (ThermoFisher Scientific), and treated  
 721 with PNK while mixed in equal amounts to a total concentration of 6 nM. The phosphorylation mix was  
 722 subsequently ligated by Ampligase® (Epicentre, USA) at 3 nM total DNA and 30 nM bridging oligonucleotide MZ-  
 723 1142 according to Chandran, 2017 [54]. All full-length DNA fragments were subsequently purified from an  
 724 agarose gel using a runVIEW system (Cleaver Scientific, UK), precipitated with sodium acetate/isopropanol,  
 725 washed with 75% ethanol and resuspended in water.

726

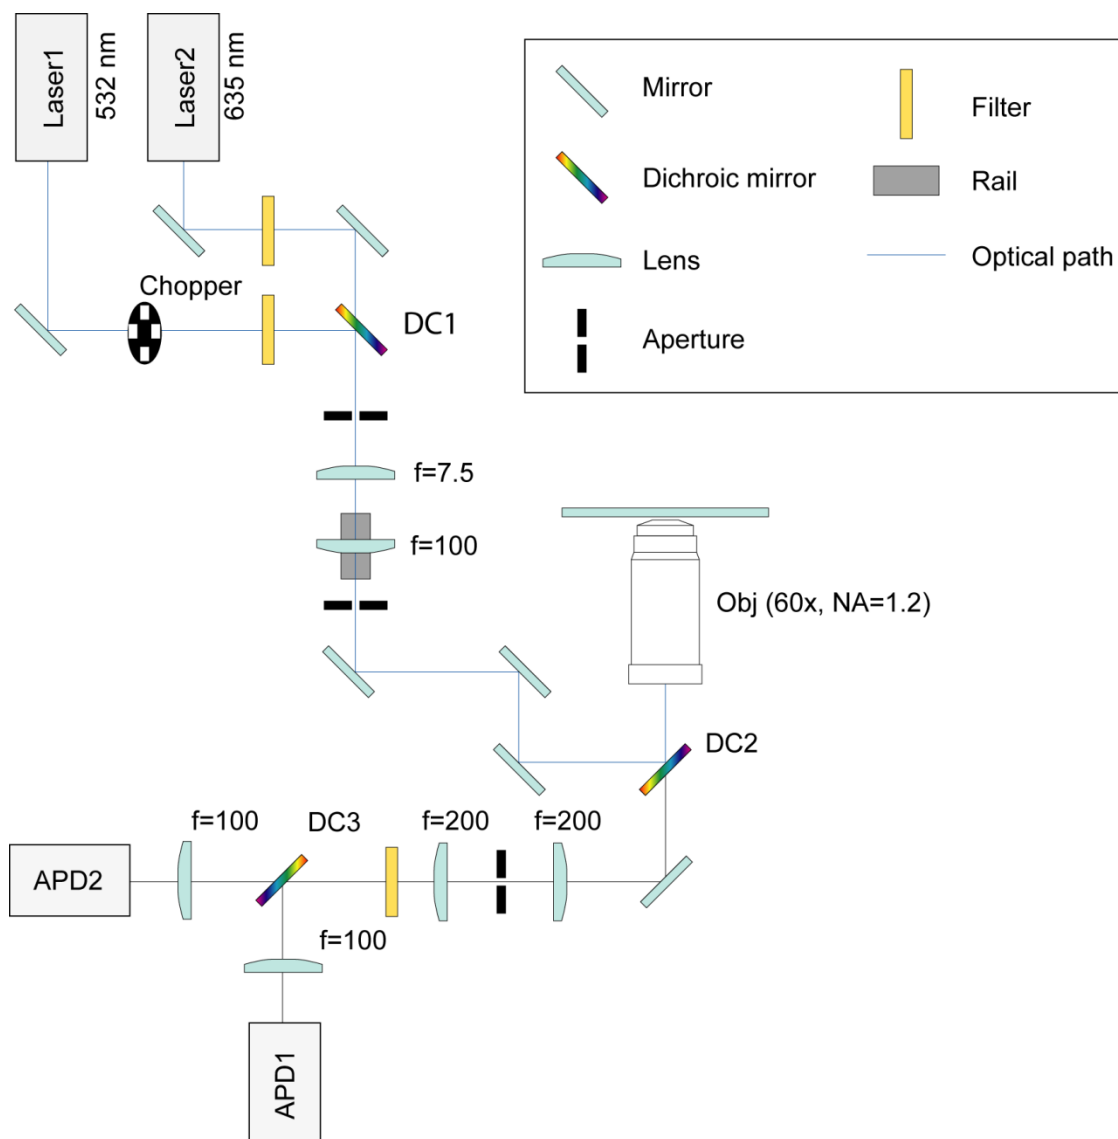

727

728 **Supplementary figure S3. Optical scheme of custom single-molecule fluorescence microscopy setup**  
729 **used to record fluorescence bursts of single diffusing molecules in this study.** APD – avalanche  
730 photodiode; f – focal distance; NA – numerical aperture.

731

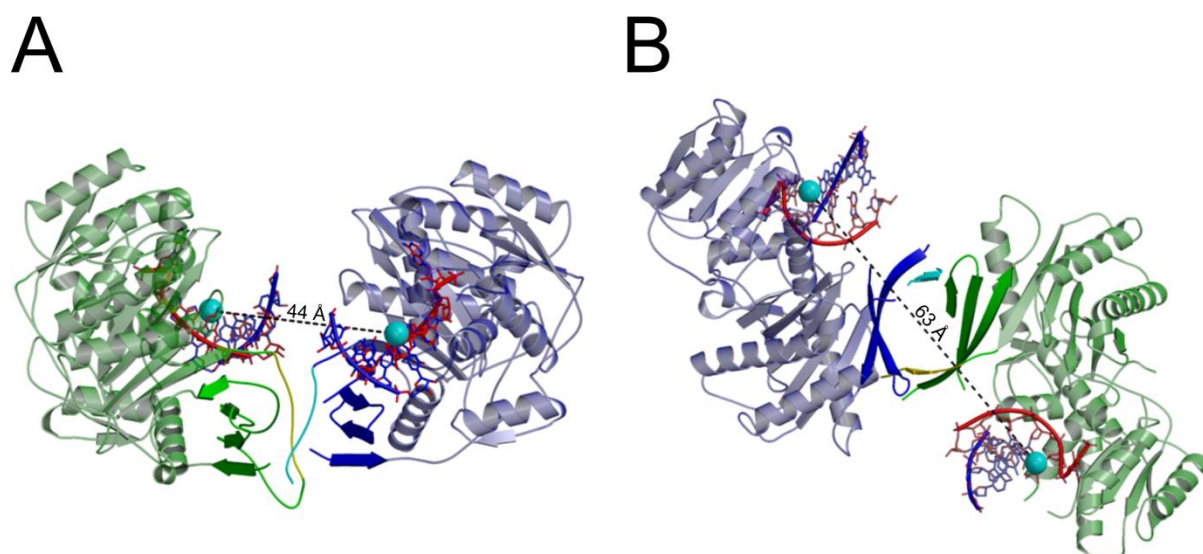

732

733 **Supplementary figure S4.** Expected positions of fluorescent labels upon formation of the looped complex. The  
734 figure is based on PDB ID 1ytu (A, 'closed'), 2w42 (B, 'open'), spheres mark fluorophore attachment sites.  
735 Protein monomers are coloured green and blue, DNA guide and target strands are red and blue respectively.

736

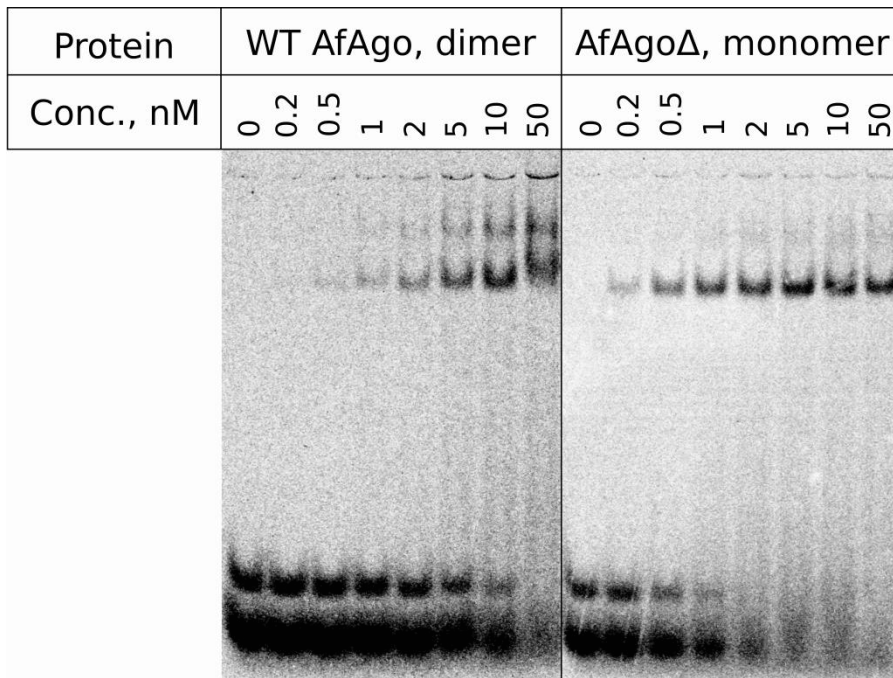

737

738 **Supplementary figure S5. DNA binding by AfAgo.** DNA binding was verified using electrophoretic mobility shift  
739 assay. Self-complementary 5'<sup>32</sup>P DNA MZ-952 was used as a substrate. Final concentration of DNA duplex in  
740 binding reaction was 1 nM, final protein concentrations are shown above each lane. Binding buffer was 40 mM  
741 Tris-acetate (pH 8.4 at 25 °C) with 1 mM EDTA (TAE, B49, Thermo Scientific), supplemented with 5 mM MgCl<sub>2</sub>,  
742 0.1 mg/ml BSA, 1 mM DTT, 10% glycerol. Running buffer – TAE (Thermo Scientific) supplemented with 5 mM  
743 MgCl<sub>2</sub>.

744

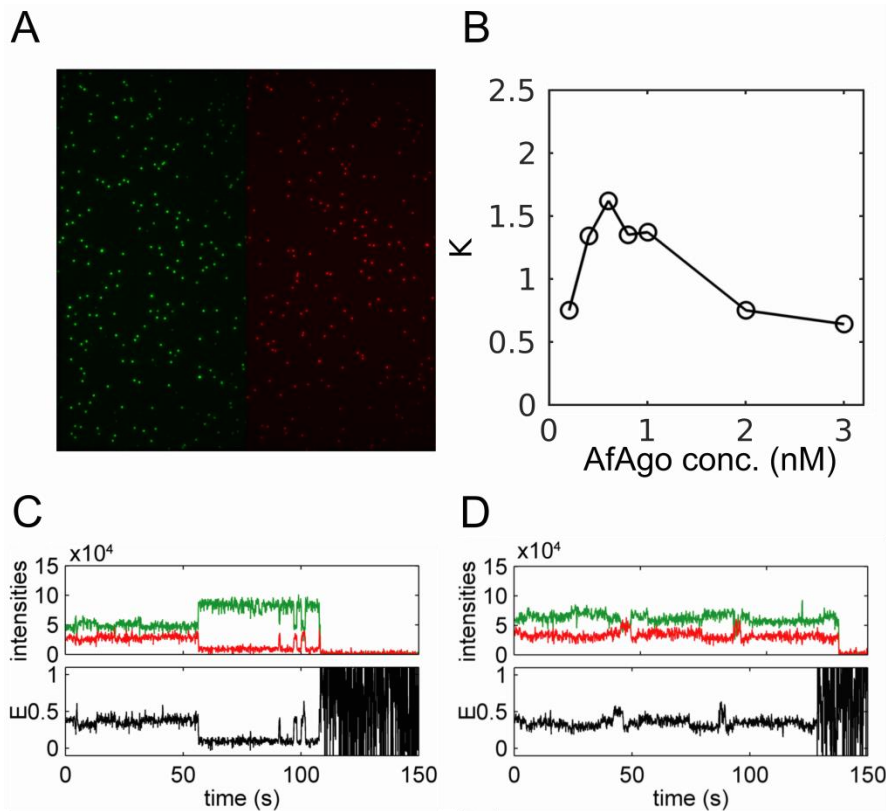

745

746 **Supplementary figure S6. Single molecule experiments.** (A) A fluorescence image of surface-immobilized  
747 DNA fragments. It is an average of 20 frames in a fluorescence movie. The left part (green) is the donor image  
748 upon donor excitation, and the right part (red) is the acceptor image upon acceptor excitation. (B) The  
749 dependence of the ratio,  $K$ , of the number of looped and unlooped DNA molecules depending on the  
750 concentration of the AfAgo for the biotinylated DNA fragment in solution. (C, D) Examples of different dynamics of  
751 DNA looping by AfAgo in TIRF experiments.

752



753 **Supplementary table S1. List of oligonucleotides used in this study.**

| Oligonucleotide | Sequence, 5'->3'                                              | Modifications                  |
|-----------------|---------------------------------------------------------------|--------------------------------|
| MZ-383          | TGATTCTGCAGTTATAGGAACCACGGATTCGTTTGTAATGAGC                   |                                |
| MZ-385          | TGATTGGATCCGATGATGGAATATAAAATAGTTGAAAATGGTTTGAC               |                                |
| MZ-875          | GCTATACTTCACTTAAATGAAACTCCTAACAAATAGATTTTCATCCGTAT<br>G       |                                |
| MZ-876          | CCTTCATACGGATGAAATCTATTGTTAGGAGTTTCATTTAAGTGAAGTATAGC         |                                |
| MZ-952          | ATCGTGGCCACGAT                                                |                                |
| MZ-1028         | GTGCTGTACCTTGACCTTGATGAACTGGCGCAACACGTATTG                    |                                |
| MZ-1031         | ATACTGGCTGCATCTAGCATACGATCTCAACACTTAATGGTTT                   |                                |
| MZ-1068         | ATTCTGGTCTCGGACTCCCATTACCCAAAATGGATGAG                        | <b>Biotin on T22</b>           |
| MZ-1069         | ATTCTGGTCTCGGACTCCCATTACCCAAAATGGATGAG                        |                                |
| MZ-1141         | CCTAACAAATAGATTTTCATCCG                                       |                                |
| MZ-1142         | GGGTAATGGGAGTCCGAGACCAGAATCCTAACAAATAGATTTTCATCC<br>GTATGAAGG |                                |
| MZ-1143         | ATTATAATTATGTATGTGCTGTACCTTGACCTTGAT                          | <b>Cy3b on T3,<br/>5'P</b>     |
| MZ-1144         | ATTATAATAGGATACTGGCTGCATCTAGCAT                               | <b>Atto647N on<br/>T3, 5'P</b> |
| MZ-1310         | ATTGCTCTACTGTATAATGCTGTGCTGTACCTTGACCTTGAT                    |                                |
| MZ-1311         | ATTGCTCTACTGTATAATGCTATACTGGCTGCATCTAGCAT                     |                                |
| MZ-1289         | ATTGTACGTACAAT                                                | <b>5'P</b>                     |

754

755

756 **Supplementary table S2. SAXS data collection and main structural parameters**

|                                                                            |                                             |                                           |                                           |
|----------------------------------------------------------------------------|---------------------------------------------|-------------------------------------------|-------------------------------------------|
| Instrument, Detector                                                       | P12, pilatus6m                              |                                           | P12, pilatus2m                            |
| Detector-to-sample distance, m                                             | 3.0                                         |                                           | 3.0                                       |
| Wavelength, nm                                                             | 0.123981                                    |                                           | 0.124                                     |
| Measured s range, nm <sup>-1</sup>                                         | 0.0224526-7.3176000                         |                                           | 0.02492870-5.064020                       |
| Number of buffer exposure frames averaged (measured) / frame exposure time | 101 (101) / 0.995 sec                       | 76 (80) / 0.195 sec                       | 40 (40) / 0.045                           |
| Number of sample exposure frames averaged (measured) / frame exposure time | 24 (24) / 0.995 sec                         | 30 (40) / 0.195 sec                       | 20 (20) / 0.045                           |
| Capillary temperature/ Sample changer temperature                          | 20 °C / Room temperature                    | 20 °C / 10 °C                             | 20 °C / 10 °C                             |
| Data reduction and on-line characterization                                | radaver (r11095), databsolute v0.1 (r11095) |                                           | radaver (v. 9729)                         |
| <b>Structural parameters</b>                                               |                                             |                                           |                                           |
| Sample                                                                     | WT AfAgo+MZ-1289, SEC peak                  | AfAgoΔ+MZ-1289, 4 mg/ml                   | Apo AfAgo, 0.13 mg/ml                     |
| Guinier points (AUTORG)                                                    | 1-87                                        | 39-132                                    | 20-114                                    |
| s range, nm <sup>-1</sup> (points) used in GNOM                            | 0.0640-3.3457 (1-1200)                      | 0.1860-3.3457 (60-1200)                   | 0.0249-2.8342 (20-1000)                   |
| Rg, nm (AUTORG/ GNOM)                                                      | 3.18 ± 0.016/<br>3.233 ± 0.005202           | 2.84 ± 0.03/<br>2.879 ± 0.002440          | 3.83 ± 0.12 /<br>3.837 ± 0.02216          |
| I(0) (AUTORG/ GNOM)                                                        | 0.0725 ± 0.00011/<br>0.07301 ± 0.00008771   | 0.0428 ± 3.7e-05/<br>0.04289 ± 0.00002499 | 0.0935 ± 0.00043 /<br>0.09310 ± 0.0005914 |
| Dmax, nm (DATCLASS/ SHANUM/ GNOM)                                          | 11.3/ 10.2/ 10.1                            | 10.9/ 10.5/ 9.6                           | 13.9/ 11.5/ 12.1                          |
| Porod volume, nm <sup>3</sup> (DATPOROD)                                   | 158.03                                      | 108.67                                    | 174.1                                     |
| SASBDB ID                                                                  | SASDH39                                     | SASDH49                                   | -                                         |

757

758

759 **Supplementary table S3. Molecular mass determination from SAXS data using various methods. All**  
 760 **molecular masses are given in kDa**

| Sample                           |           |                                                                                    | WT AfAgo+MZ-1289                                    | AfAgoΔ+MZ-1289                                        | Apo AfAgo                     |
|----------------------------------|-----------|------------------------------------------------------------------------------------|-----------------------------------------------------|-------------------------------------------------------|-------------------------------|
| Expected MW (protein + DNA), kDa |           |                                                                                    | 110.5                                               | 56.6                                                  | 101.7                         |
| Method                           | Reference | Software                                                                           | MWcalc                                              |                                                       |                               |
| Absolute scale                   | [55]      | PRIMUS 2.8.4<br>(r10552)                                                           | 99.7                                                | 55.4                                                  | 130.2                         |
| Qp                               |           |                                                                                    | 102.7                                               | 58.5                                                  | 128.8                         |
| Bayes                            |           |                                                                                    | 94.2                                                | 56.9                                                  | 124.5                         |
| Size&Shape                       |           |                                                                                    | 100.0                                               | 67.9                                                  | 133.1                         |
| Porod volume/1.6                 | [40]      | DATPOROD,<br>ATSAS 2.8.4<br>(r10552)                                               | 98.8                                                | 67.9                                                  | 108.8                         |
| SAXSMoW                          | [56]      | SAXSMoW<br>v2.1<br><a href="http://saxs.ifsc.usp.br/">http://saxs.ifsc.usp.br/</a> | 106.9 (integrated to<br>$10/I(q_{max})=10^{2.25}$ ) | 67.4<br>(integrated to<br>$10/I(q_{max})=10^{2.25}$ ) | 125.0<br>(integrated to 8/Rg) |
| SEC MW                           |           | CHROMIXS<br>ATSAS 2.8.4<br>(r10552)                                                | 103.8                                               | n.a.                                                  | n.a.                          |

761

762

763 **Supplementary table S4. AfAgo dimerization interfaces as analyzed by PISA (PDBe PISA v1.52**  
 764 **[20/10/2014])**

| PDB ID | Dimer:<br>open/<br>closed | Image                                                                               | CSS Complex<br>Formation<br>Significance<br>Score | $\Delta iG$ P-values | PISA:<br>dimerization<br>surface, $\text{\AA}^2$<br>(buried in<br>interface) |
|--------|---------------------------|-------------------------------------------------------------------------------------|---------------------------------------------------|----------------------|------------------------------------------------------------------------------|
| 1w9h   | open                      | 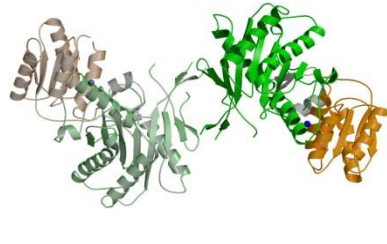   | 0.108                                             | 0.004                | 731                                                                          |
| 1ytu   | closed                    |   | 1                                                 | 0                    | 908                                                                          |
| 2bgg   | open                      |  | 1                                                 | 0.001                | 601                                                                          |
| 2w42   | open                      |  | 1                                                 | 0.002                | 748                                                                          |

765
